# Supplementary material for: Retroviral infection of human neurospheres and use of stem Cell EVs to repair cellular damage
Source: PubMed Central journal article supplement (PMC8821538; doi:10.1038/s41598-022-05848-x), 2022-02-07
Supplement: 41598_2022_5848_MOESM1_ESM.pdf [file 41598_2022_5848_MOESM1_ESM.pdf]

## **Retroviral Infection of Human Neurospheres and Use of Stem Cell EVs to Repair Cellular Damage**

**Heather Branscome<sup>1,2</sup>, Pooja Khatkar<sup>1</sup>, Sarah Al Sharif<sup>1</sup>, Dezhong Yin<sup>3</sup>, Sheela Jacob<sup>3</sup>, Maria Cowen<sup>1</sup>, Yuriy Kim<sup>1</sup>, James Erickson<sup>1</sup>, Christine A. Brantner<sup>4</sup>, Nazira El-Hage<sup>5</sup>, Lance A. Liotta<sup>6</sup> and Fatah Kashanchi<sup>1\*</sup>**

<sup>1</sup> Laboratory of Molecular Virology, School of Systems Biology, George Mason University, Manassas, VA.

<sup>2</sup> American Type Culture Collection (ATCC), Manassas, VA.

<sup>3</sup> ATCC Cell Systems, Gaithersburg, MD.

<sup>4</sup> GW Nanofabrication and Imaging Center, George Washington University, Washington, DC.

<sup>5</sup> Department of Immunology and Nano-Medicine, Herbert Wertheim College of Medicine, Florida International University, Miami, FL.

<sup>6</sup> Center for Applied Proteomics and Molecular Medicine, George Mason University, Manassas, VA.

**Supplementary Table 1.** Valid data and associated quality scores corresponding to lncRNA from each EV preparation. Data represents the average values from 3 biological replicates of each EV preparation.

| Sample          | Raw Data |       | Valid Data |      | Valid Ratio (reads) | Q20%  | Q30% | GC content% |
|-----------------|----------|-------|------------|------|---------------------|-------|------|-------------|
|                 | Read     | Base  | Read       | Base |                     |       |      |             |
| <b>A549 EVs</b> | 5.2E+07  | 8.0G  | 4.9E+07    | 7.1G | 87.4                | 98.92 | 92.3 | 42.00       |
| <b>iPSC EVs</b> | 7.7E+07  | 12.4G | 6.5E+07    | 9.5G | 82.5                | 99.31 | 94.2 | 60.50       |
| <b>MSC EVs</b>  | 5.3E+07  | 8.1G  | 3.9E+07    | 5.9G | 70.2                | 98.96 | 92.2 | 50.50       |

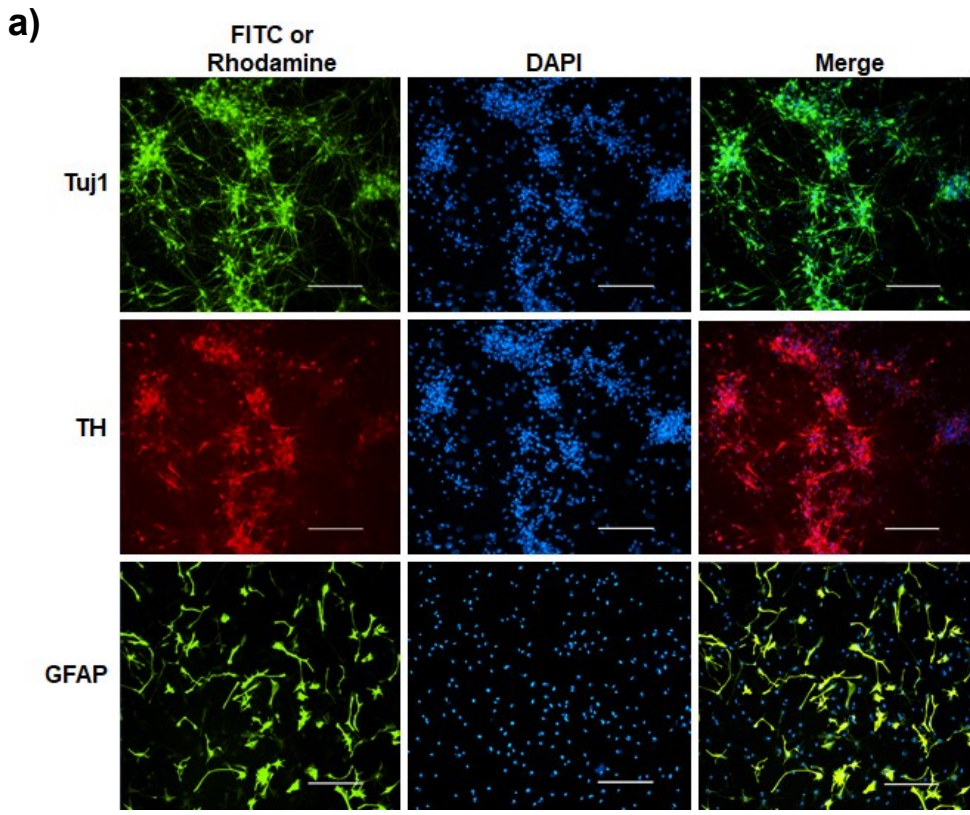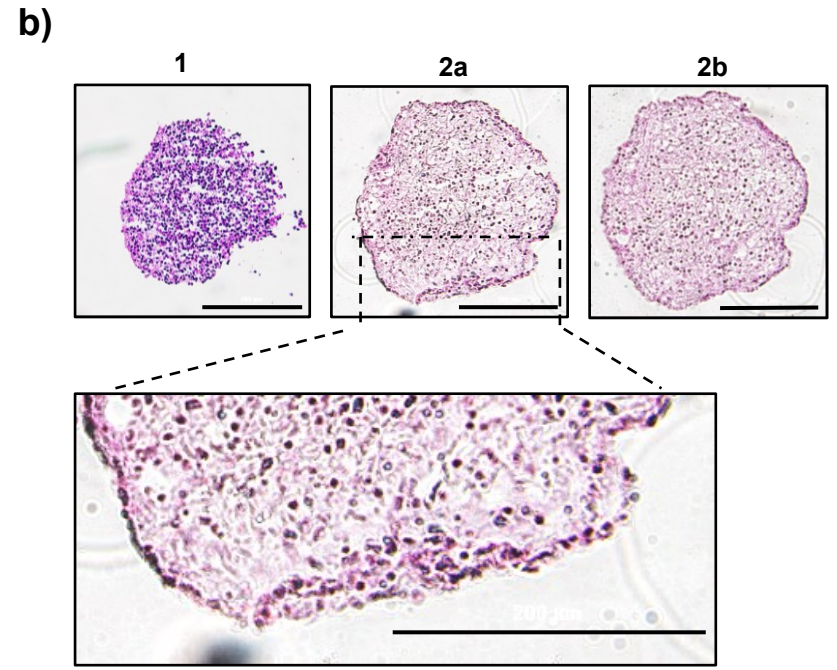

**Supplementary Figure 1. (a)** ICC staining of 2D cultures of differentiated NPCs. Differentiated NPCs were incubated with antibodies against immature neurons (Tuj1), dopaminergic neurons (TH), and astrocytes (GFAP). Fluorescent images show the relative expression of Tuj1, TH, and GFAP. Nuclei were counterstained with DAPI. Scale bar = 400  $\mu$ m. **(b)** H&E staining was performed on cross-sectioned, differentiated NPC-derived neurospheres. Representative images from two different neurospheres are shown. Images 2a and 2b represent different cross-sections generated from the same neurosphere.

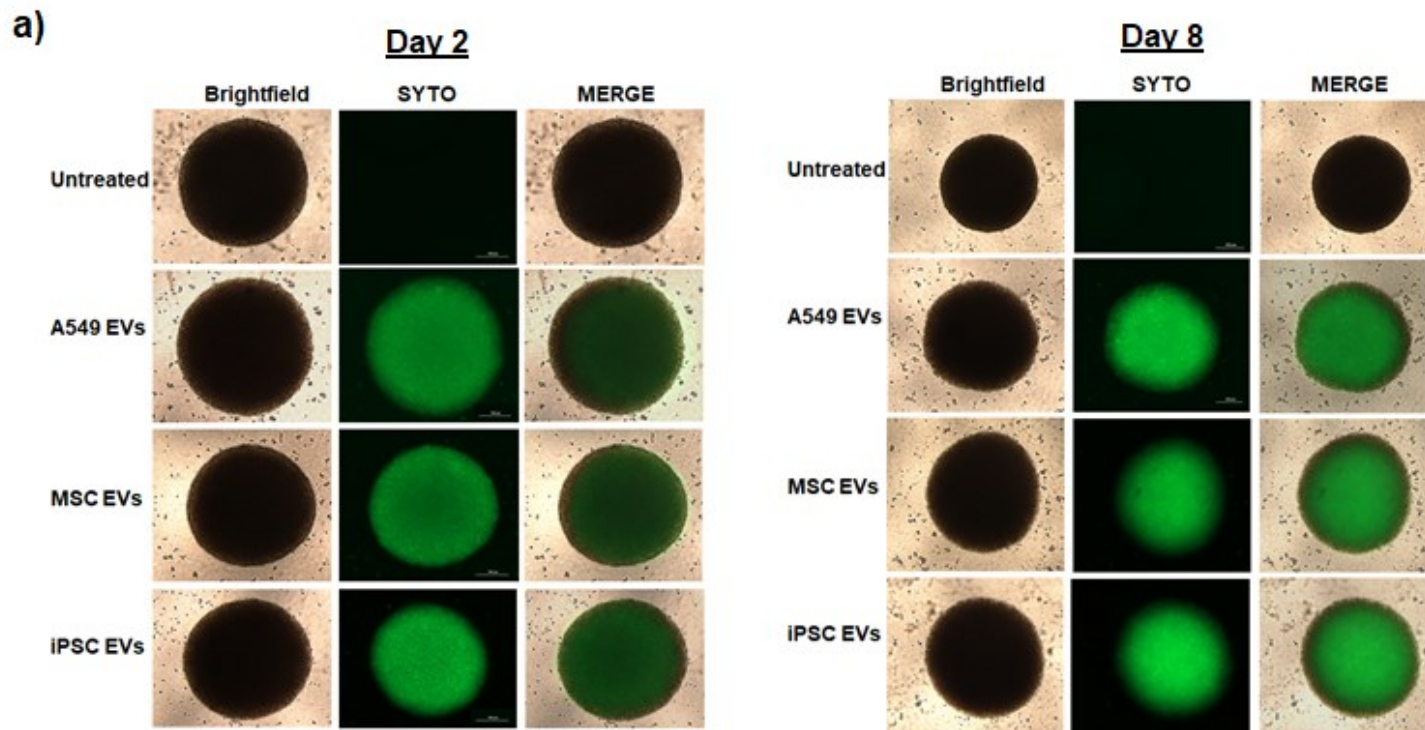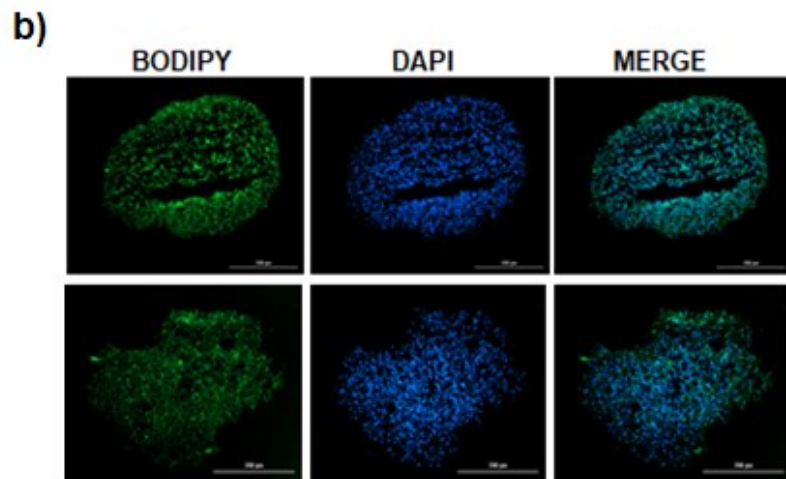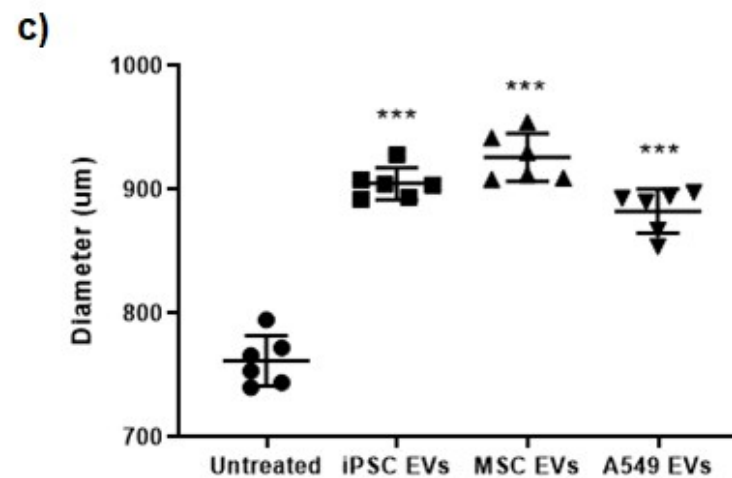

d)

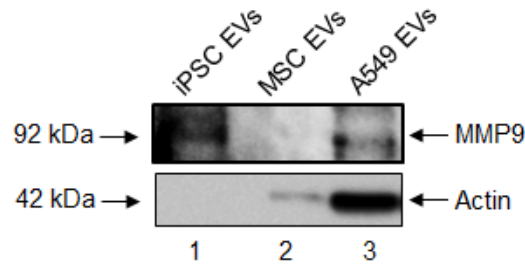

e)

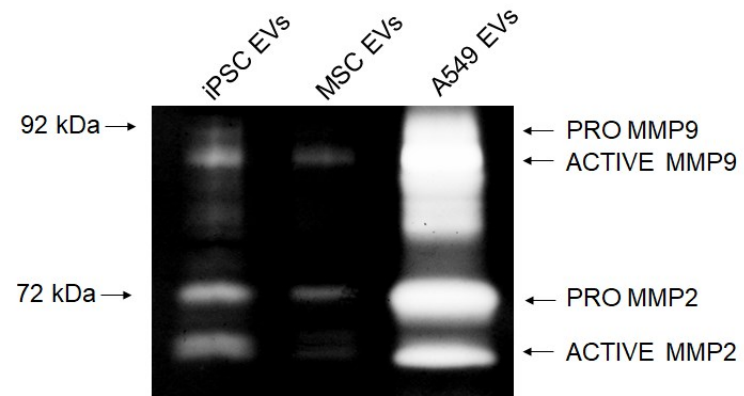

**Supplementary Figure 2.** (a) EVs were fluorescently labeled with SYTO RNASelect Green Fluorescent Stain. After removal of excess dye, EVs were added to differentiated neurospheres (day 0) at an approximate ratio of 1:250 (recipient cell to EV ratio). After 24 hours media was completely replaced. Representative brightfield and fluorescent images show the relative uptake of EVs on days 2 and 8. Scale bar = 200  $\mu$ m. n = 3. (b) Fluorescent images of cross-sectioned, iPSC EV-treated neurospheres show the relative distribution of fluorescently labeled (BODIPY) EVs. Scale bar = 200  $\mu$ m. (c) The average diameter (two measurements per sphere) of EV-treated neurospheres was measured using calibrated imaging software. n = 3. \*\*\* p < 0.0001 relative to untreated. (d) Western blot was performed to evaluate the relative expression of MMP9 in each EV preparation. (e) Gelatin zymography was performed to examine the proteolytic activity of EVs. Imaging of the stained gel shows areas of gelatin degradation corresponding to both MMP9 and MMP2 activity.

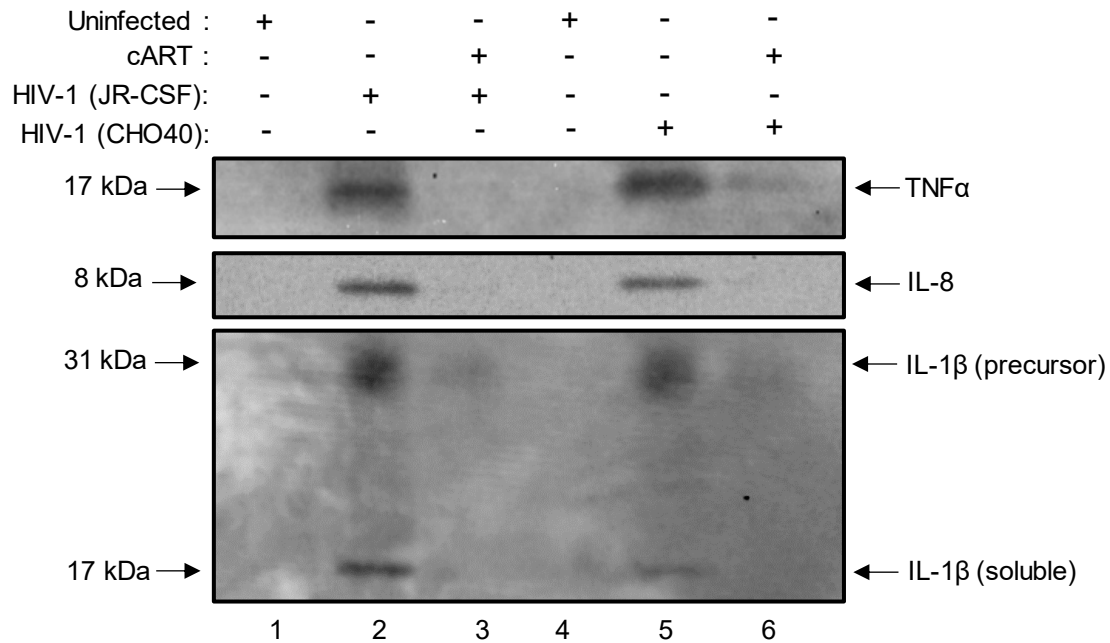

**Supplementary Figure 3.** Differentiated neurospheres were exposed to HIV-1 (JR-CSF and CHO40; MOI:10) with or without cART (lamivudine, tenofovir disoproxil fumarate, emtricitabine, indinavir) for a period of seven days. Western blot was performed on neurosphere supernatants to assess the relative expression of TNF $\alpha$ , IL-8, and IL-1 $\beta$ .

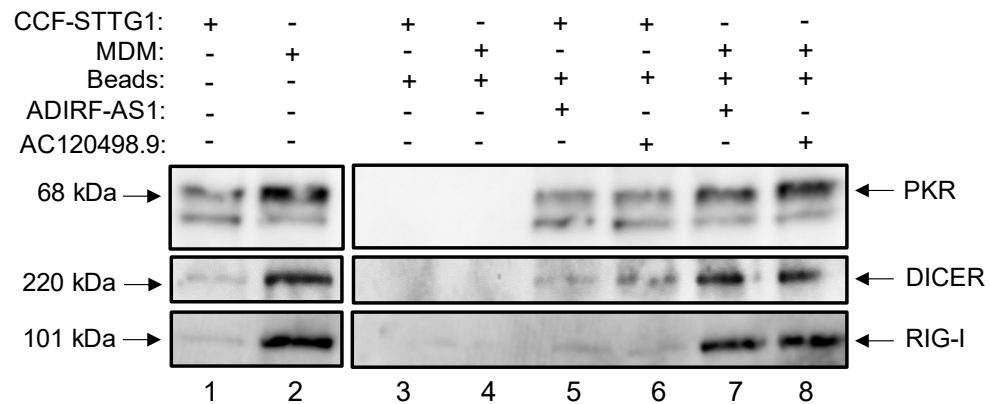

**Supplementary Figure 4.** RNA pulldown assay. Biotin-conjugated synthetic RNA sequences corresponding to the sequences of interest from ADIRF-AS1 and AC120498.9 were incubated with either CCF-STTG1 or MDM extract. Western blot was performed to assess the expression of different RNA binding proteins (PKR, Dicer, RIG-I).

a)

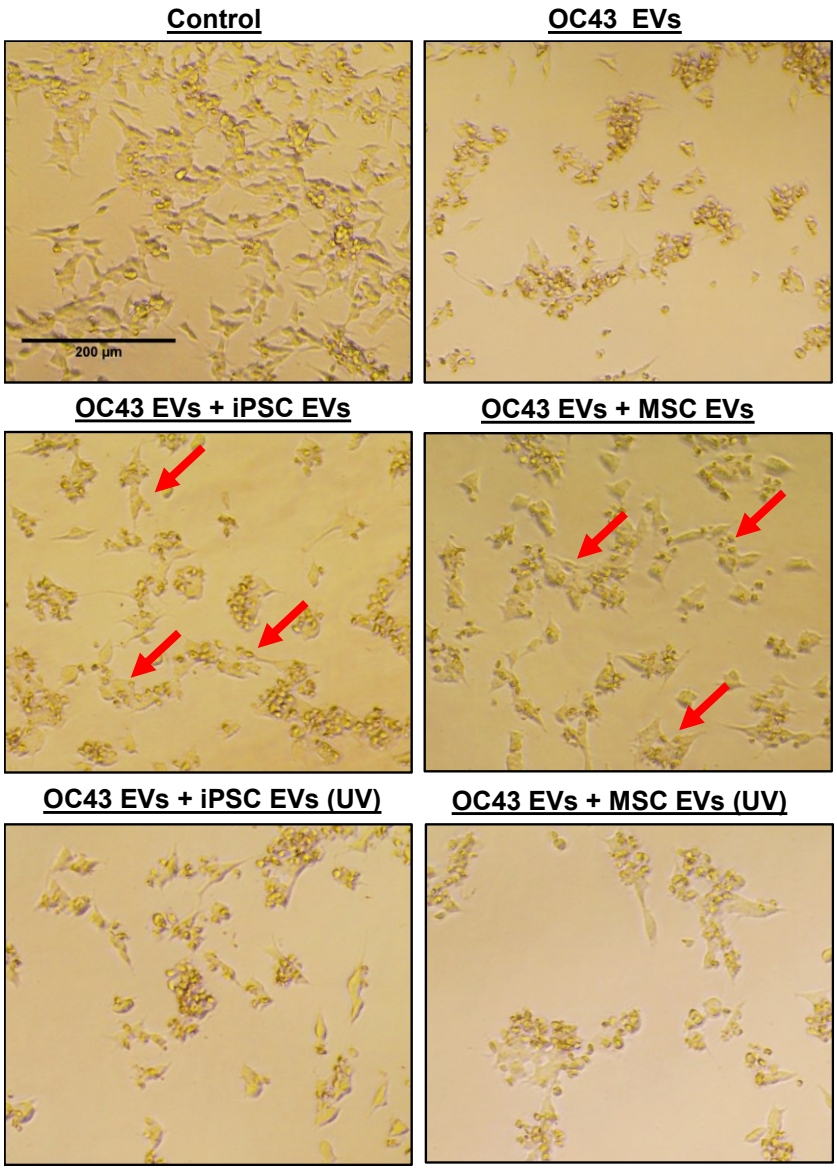

b)

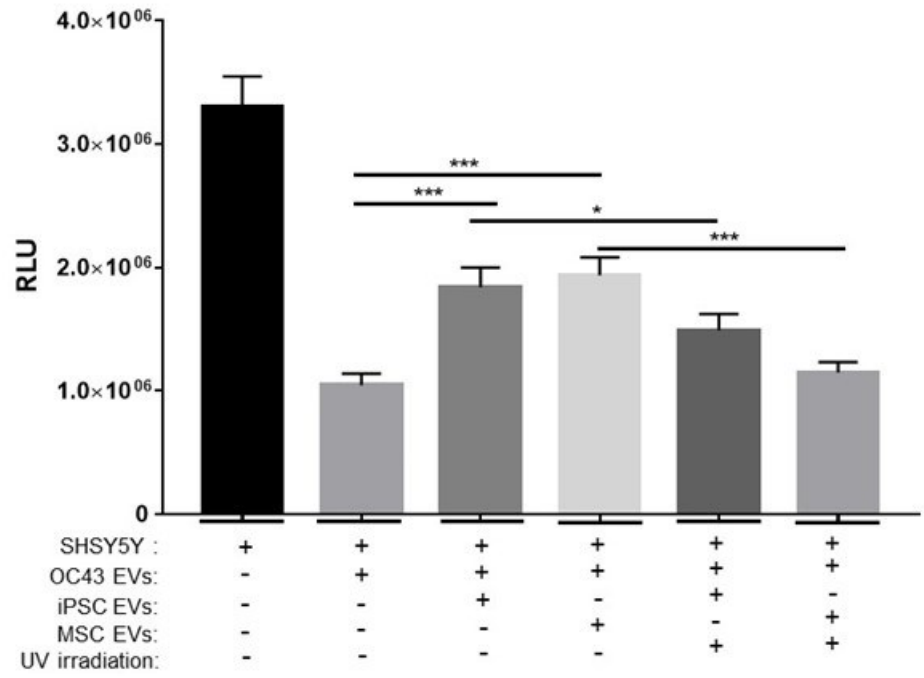

**Supplementary Figure 5.** Cellular viability assay. SHSY5Y cells were exposed to EVs from OC43 infected cells with or without treatment of stem cell EVs at an approximate ratio of 1:1000 (recipient cell to EV ratio). Stem cell EVs were exposed to UV(C) to inactivate EV-associated RNAs. **(a)** Representative images show the appearance and morphology of cells after 8 days in culture. Scale bar = 200 μm. n = 3. **(b)** Cell viability was quantified via CellTiter-Glo. n=3. \* p < 0.05, \*\*\* p < 0.0001.



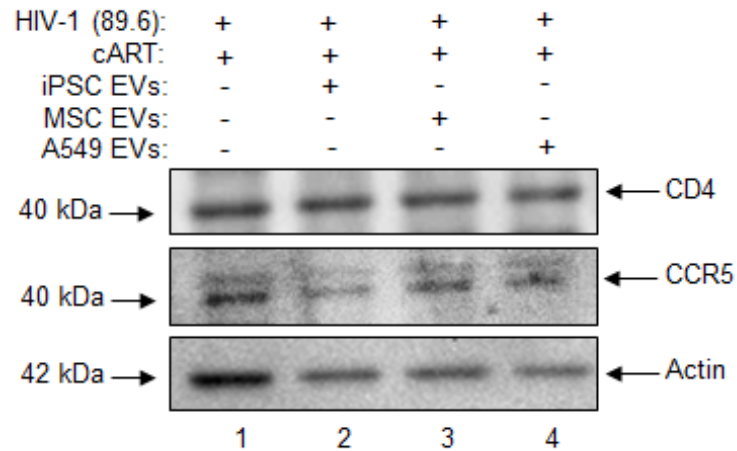

**Supplementary Figure 6.** Differentiated neurospheres were exposed to dual-tropic HIV-1 89.6 with or without cART (lamivudine, tenofovir disoproxil fumarate, emtricitabine, indinavir) for a period of fourteen days. Additionally, the HIV-1 + cART treated samples were treated with either iPSC, MSC, or A549 EVs. Western blot was performed on neurosphere lysates to evaluate the relative expression of CD4 and CCR5.

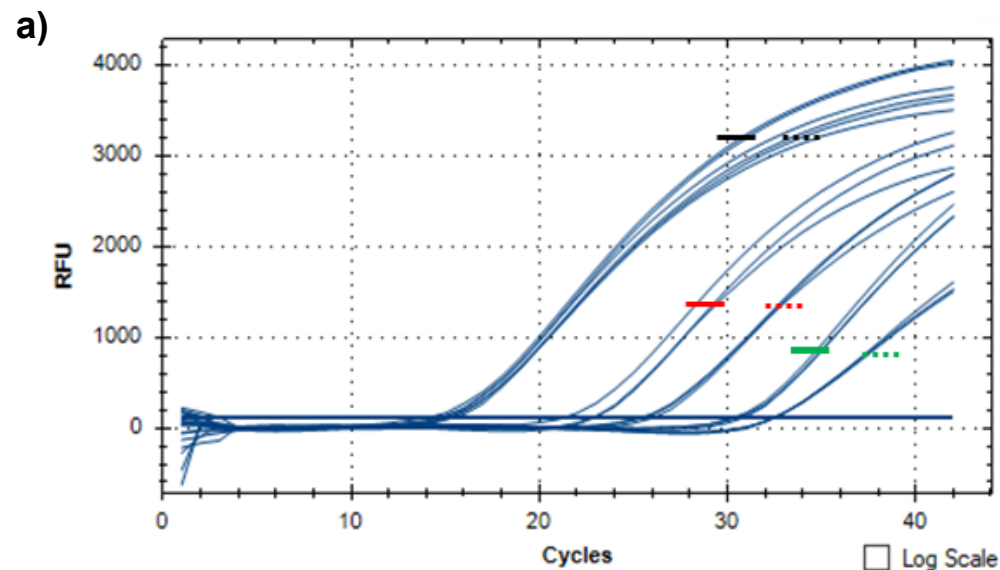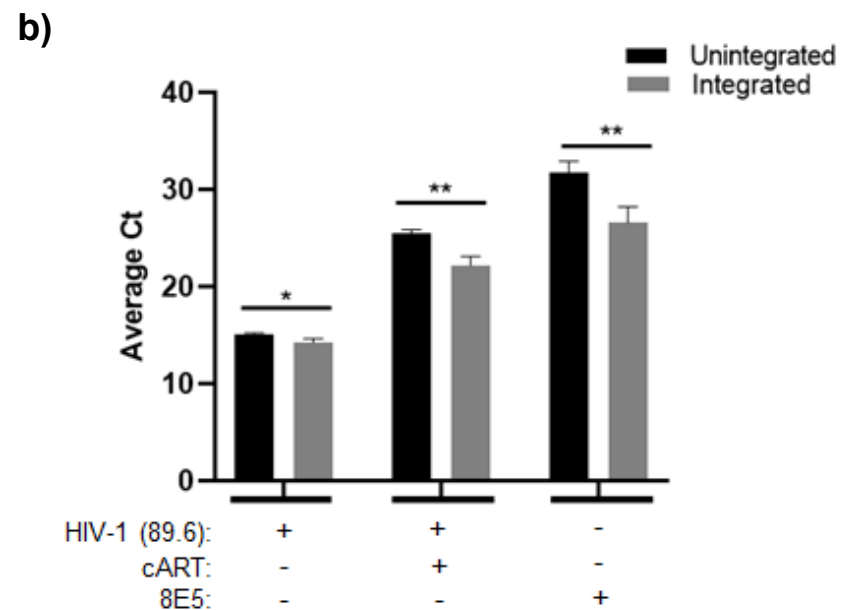

**Supplementary Figure 7.** Integration assay. Differentiated neurospheres were exposed to dual-tropic HIV-1 89.6 with or without cART (lamivudine, tenofovir disoproxil fumarate, emtricitabine, indinavir) for a period of fourteen days. **(a)** DNA from each sample (100 ng) was used to perform PCR using Alu-*gag* (integrated) or *gag*-only (unintegrated) primers, followed by a second quantitative PCR using nested primers and probes targeting the HIV-1 LTR region. DNA from the HIV-1 infected cell line 8E5 (100 ng) was used as a positive control. Ct values for the three replicates corresponding to each sample are shown. Ct values corresponding to integrated DNA are denoted by solid lines and Ct values corresponding to unintegrated DNA are denoted by dashed lines. Black lines represent data from HIV-1 infected neurospheres, red lines represent HIV-1 infected + cART neurospheres, and green lines represent 8E5 positive control cells. **(b)** The bar graph shows the average Ct values shown in panel a. A two-tailed Student's t-test was used to assess significance. n = 3. \* p < 0.05, \*\* p < 0.01.

Pr55/p24 (Fig. 2a)

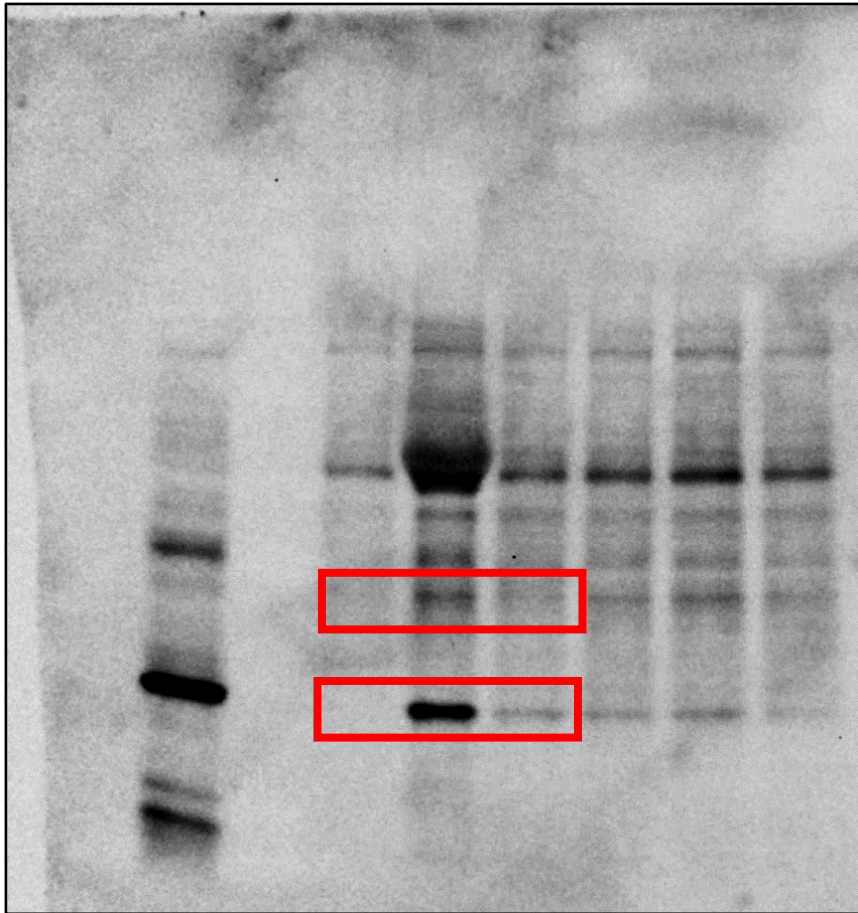

Nef (Fig. 2a)

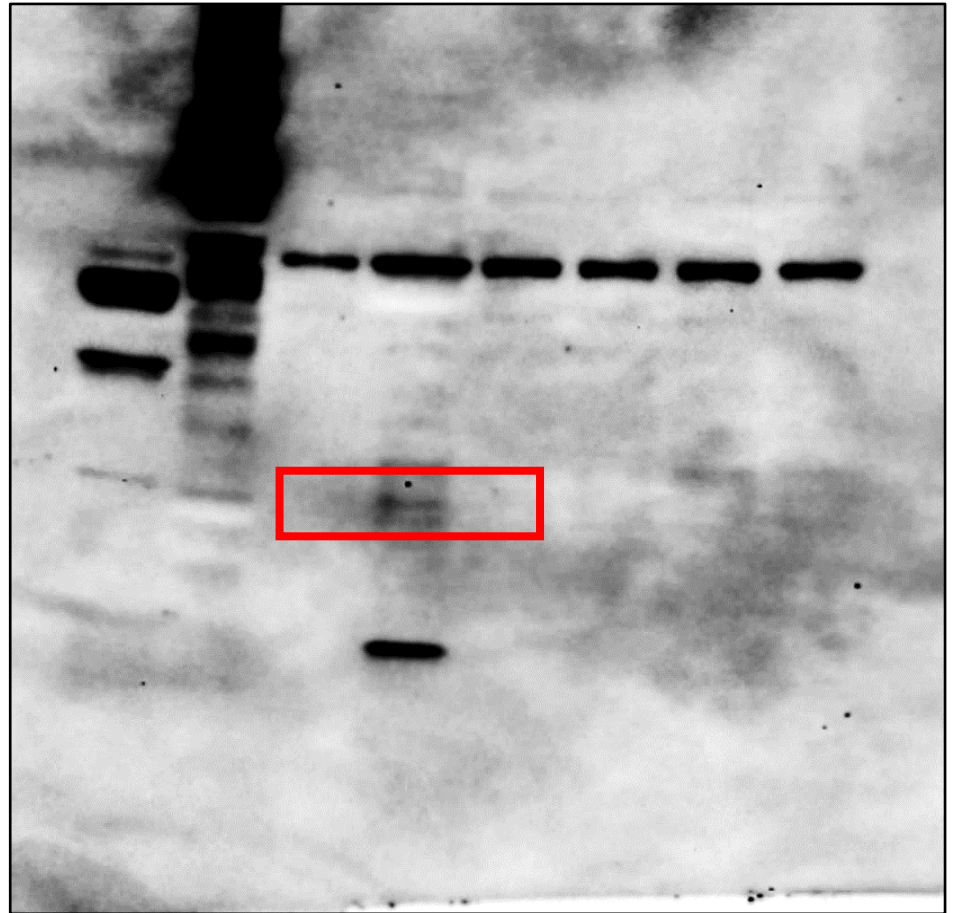

Actin (Fig. 2a)

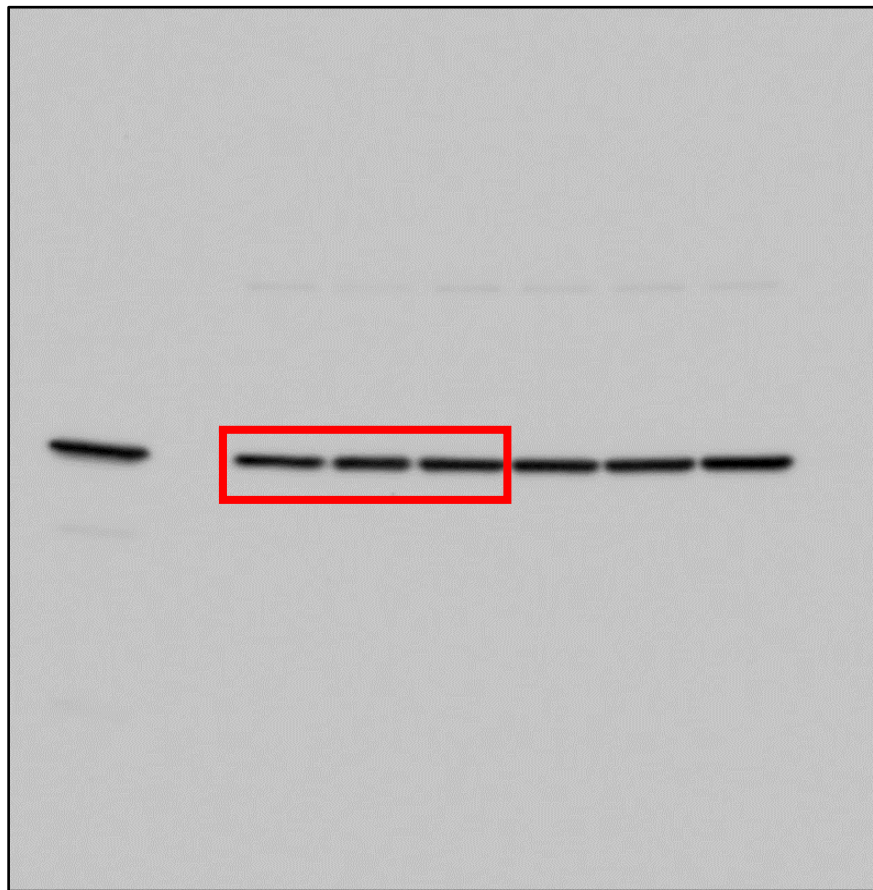

p24 (Fig. 2c)

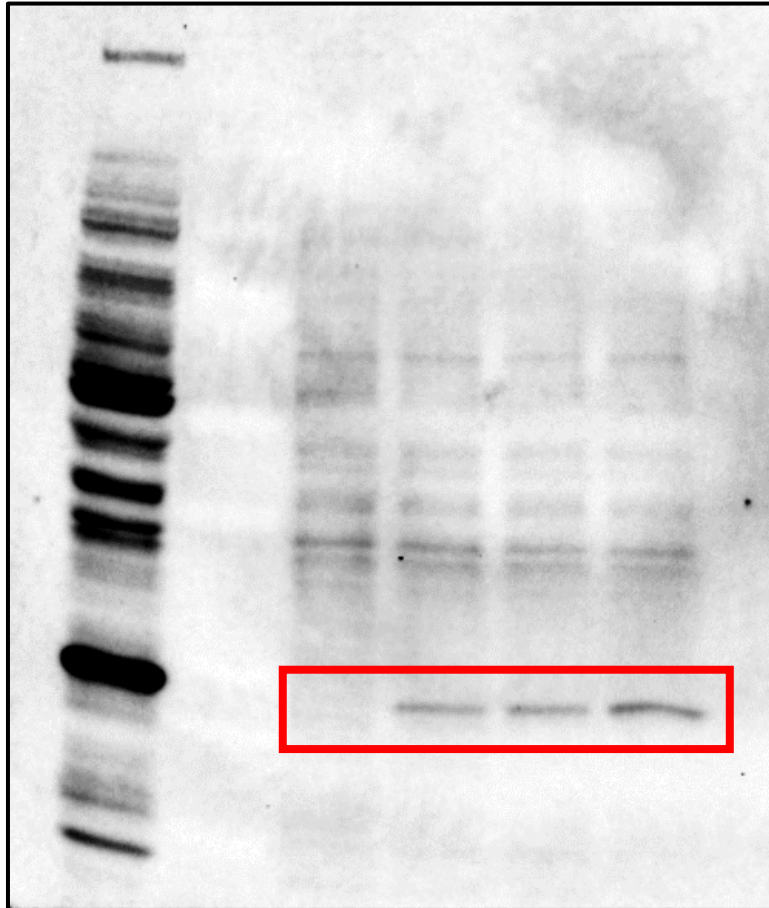

Actin (Fig. 2c)

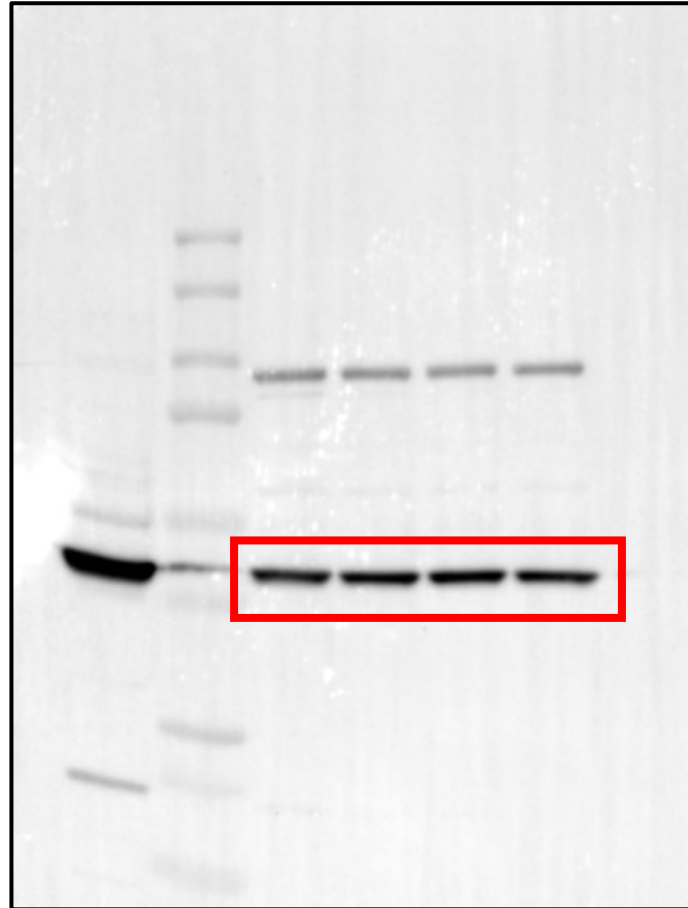

Pr55/p24 (Fig. 2e)

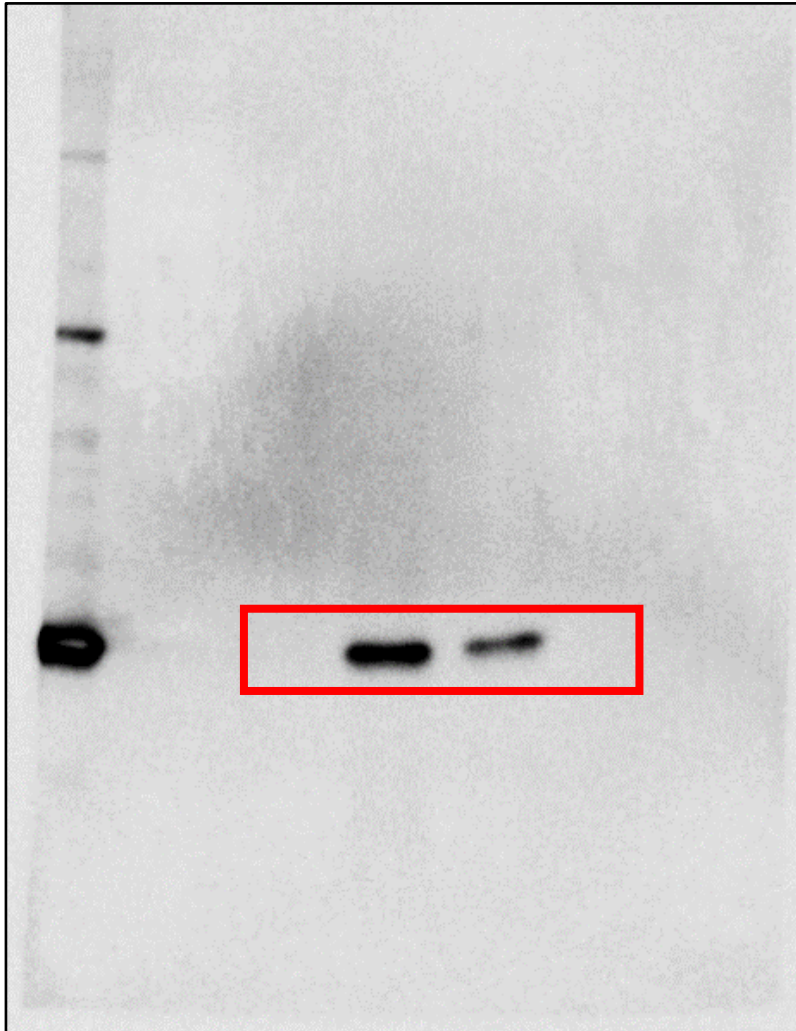

Nef (Fig. 2e)

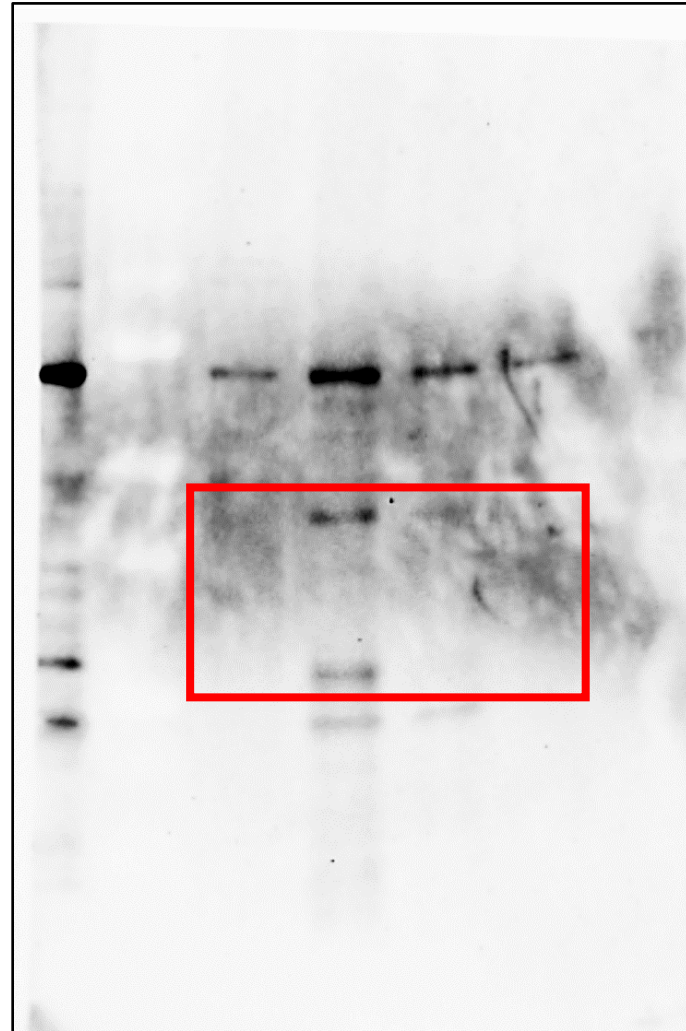

IBA-1 (Fig. 2e)

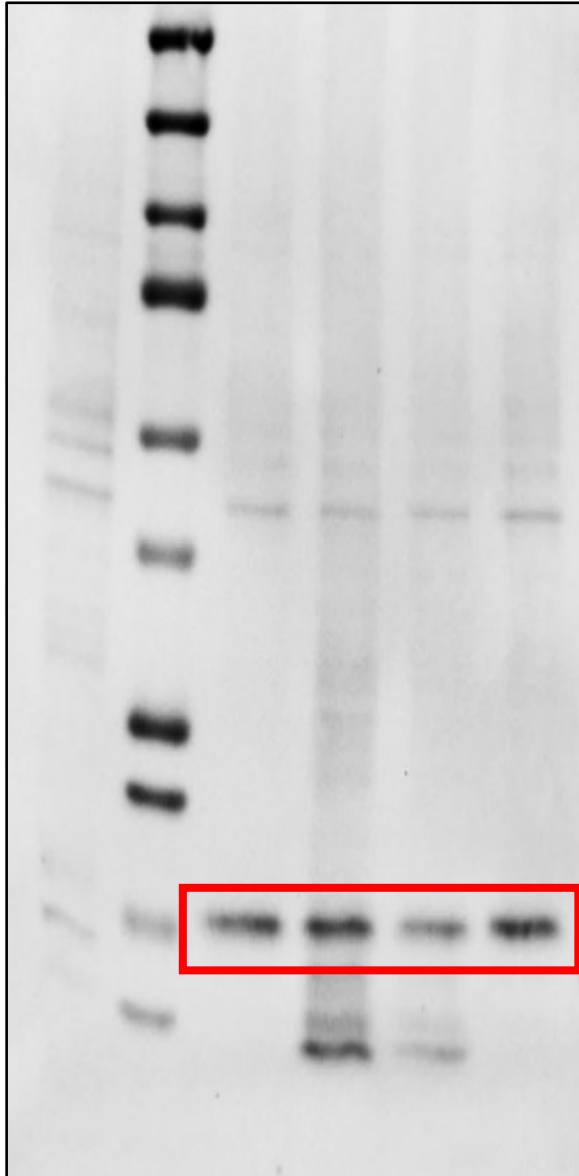

CD11b (Fig. 2e)

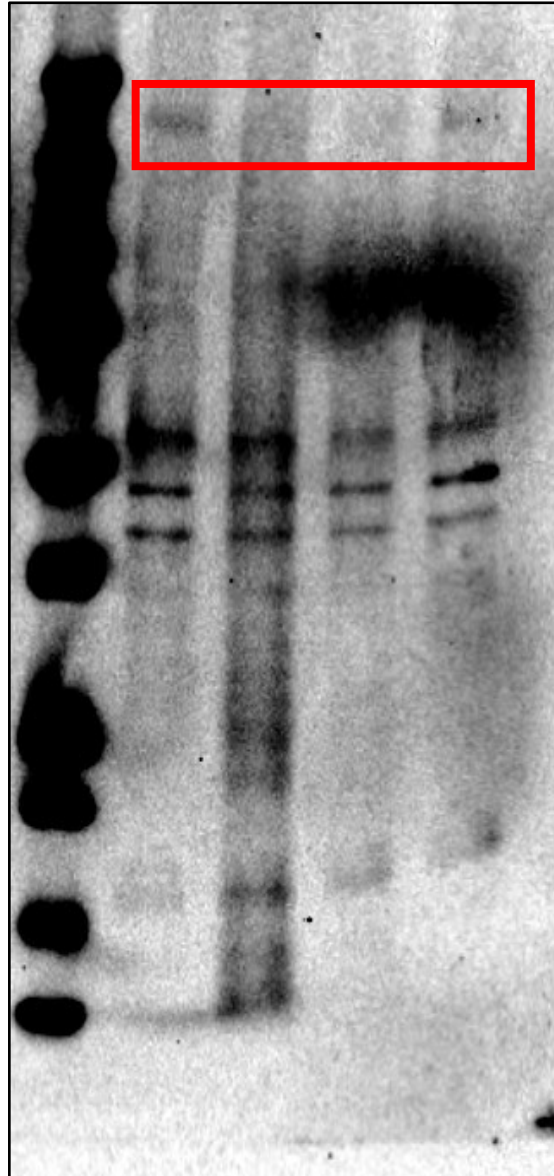

CD45 (Fig. 2e)

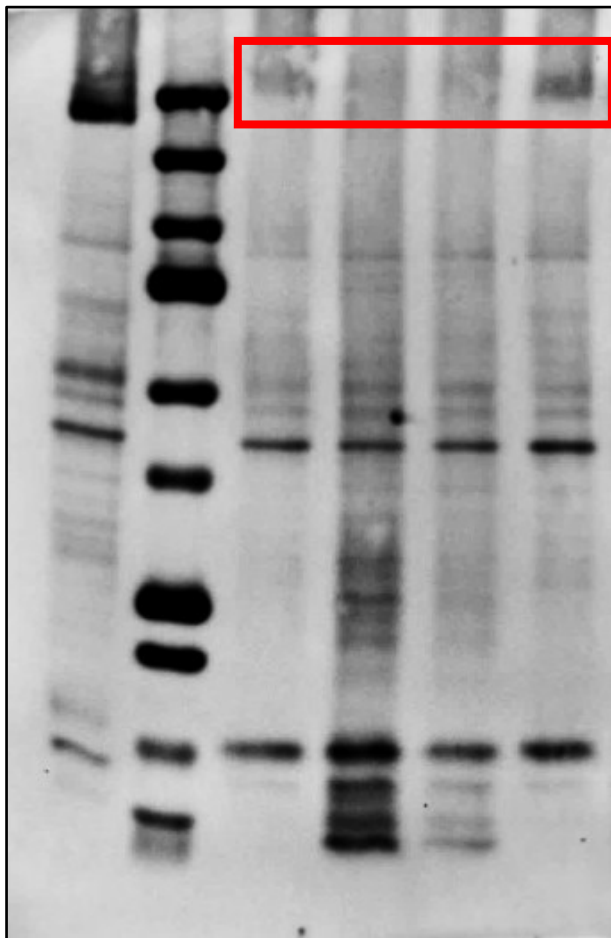

PARP-1 (Fig. 2e)

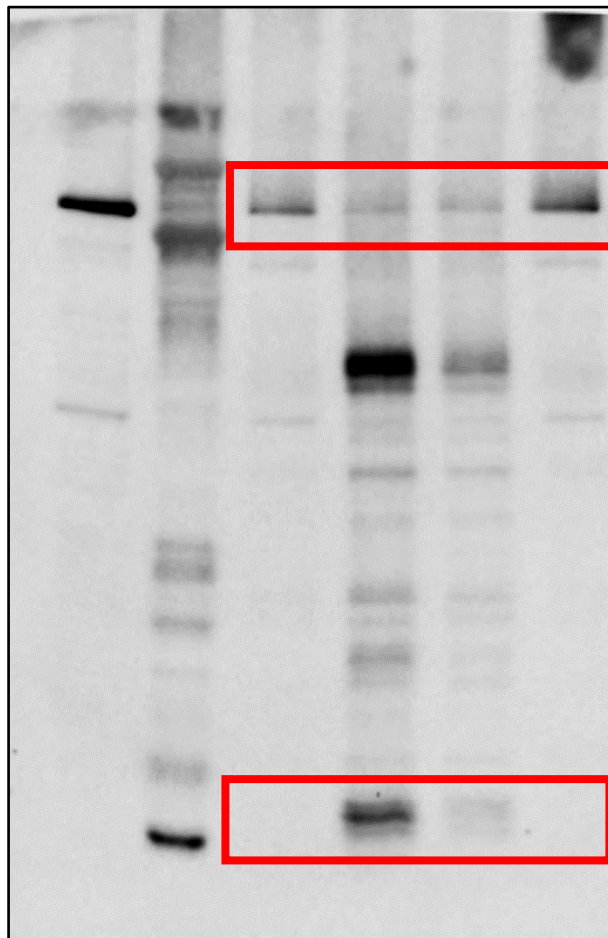



BAD (Fig. 2e)

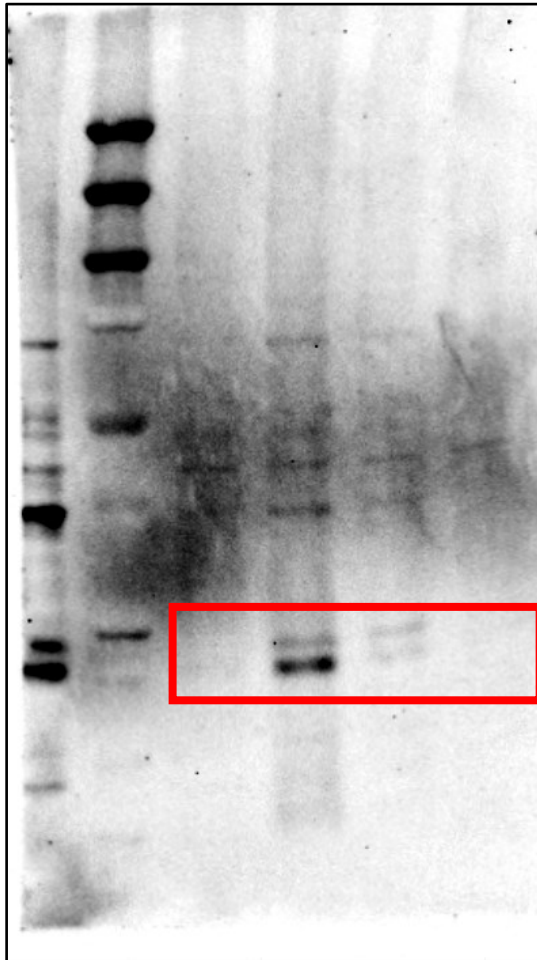

Actin (Fig. 2e)

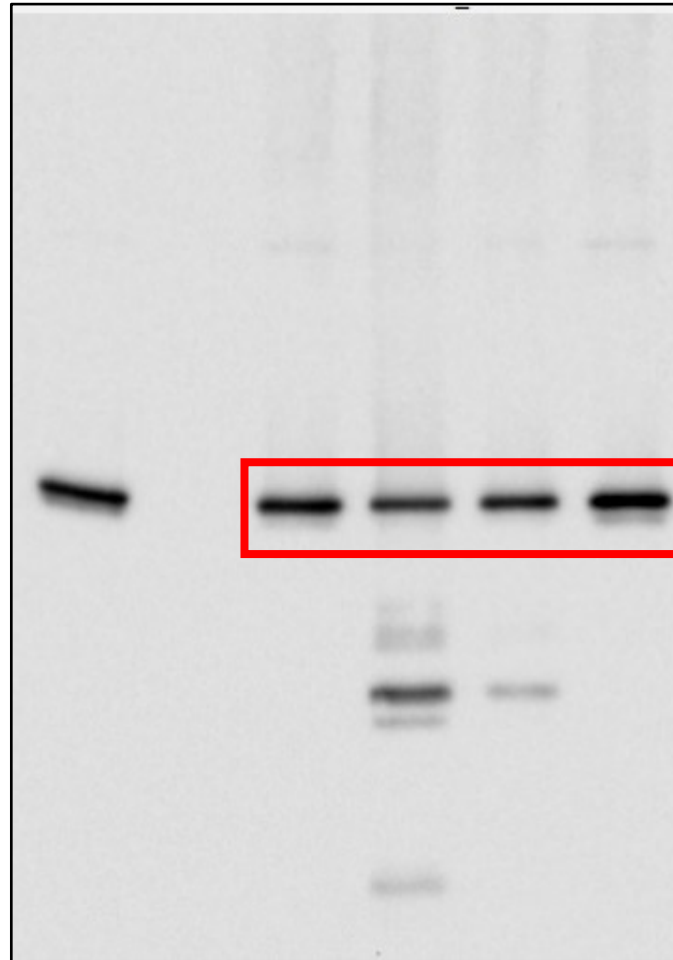

Glutamine Synthetase (Fig. 3a)

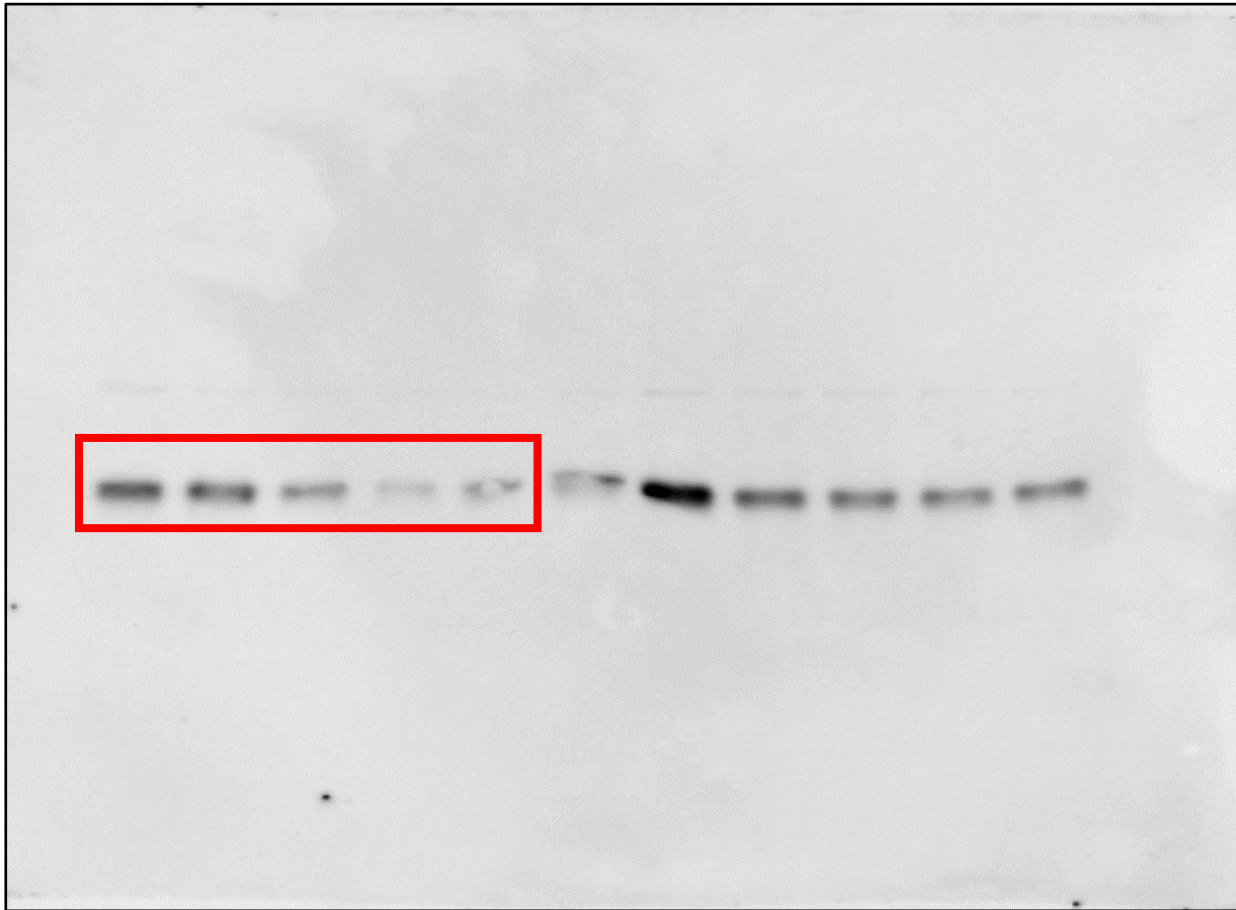

GFAP (Fig. 3a)

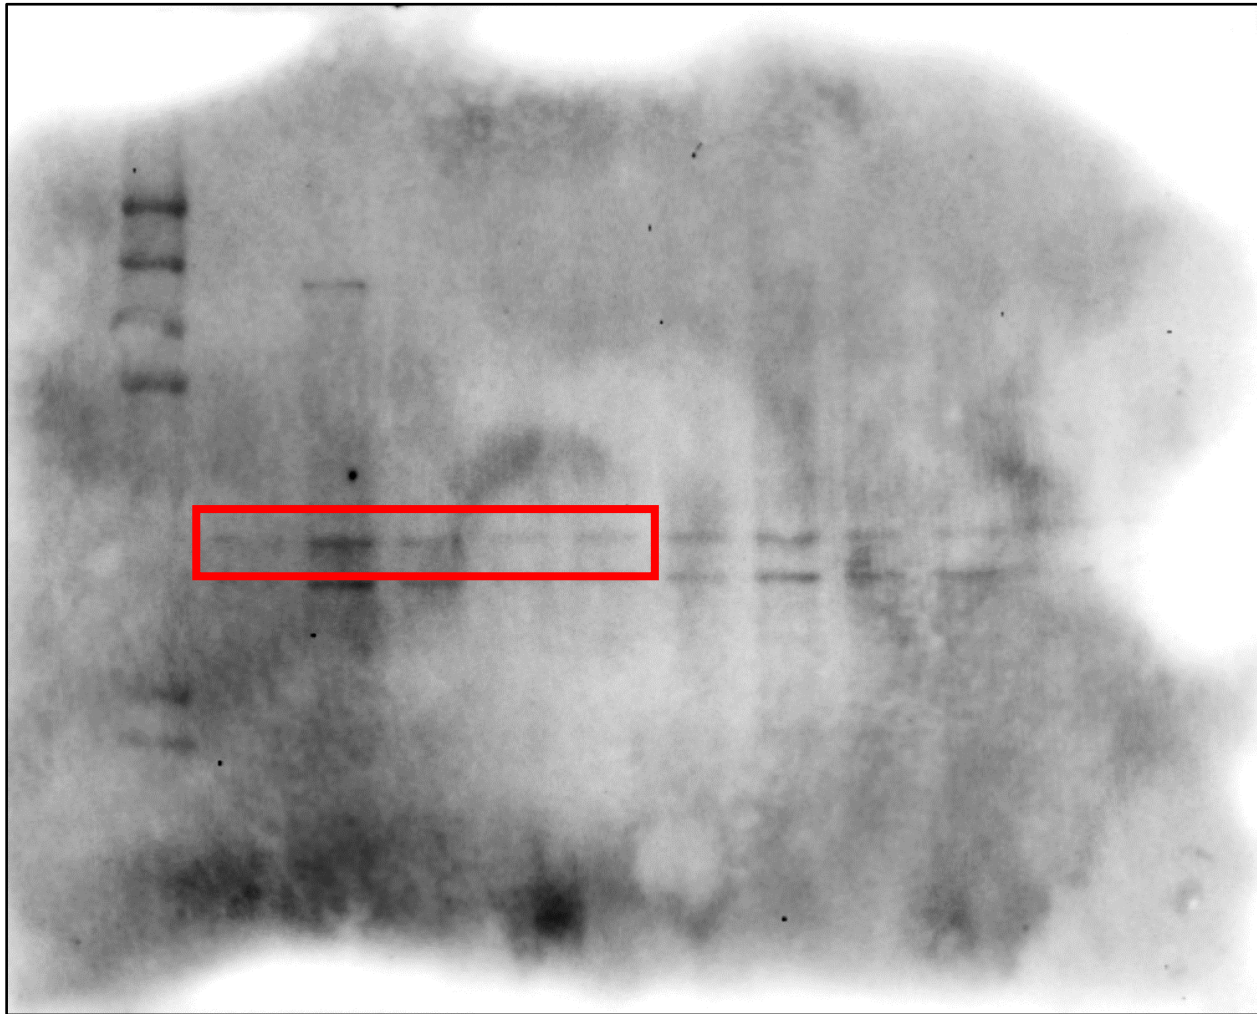

Tyrosine Hydroxylase (Fig. 3a)

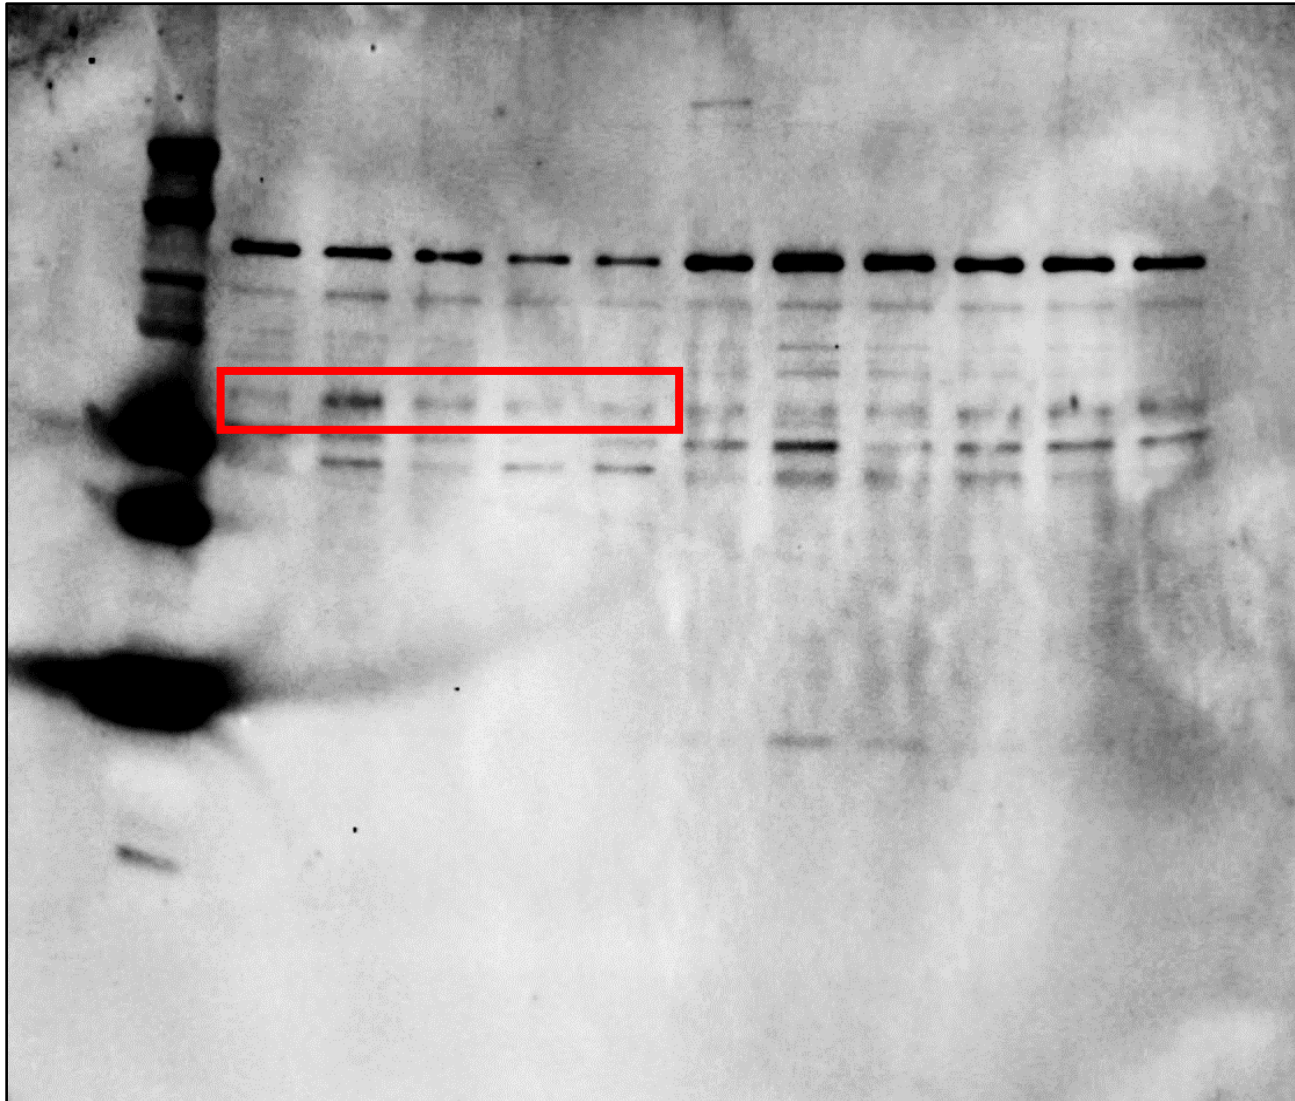

FOXA2 (Fig. 3a)

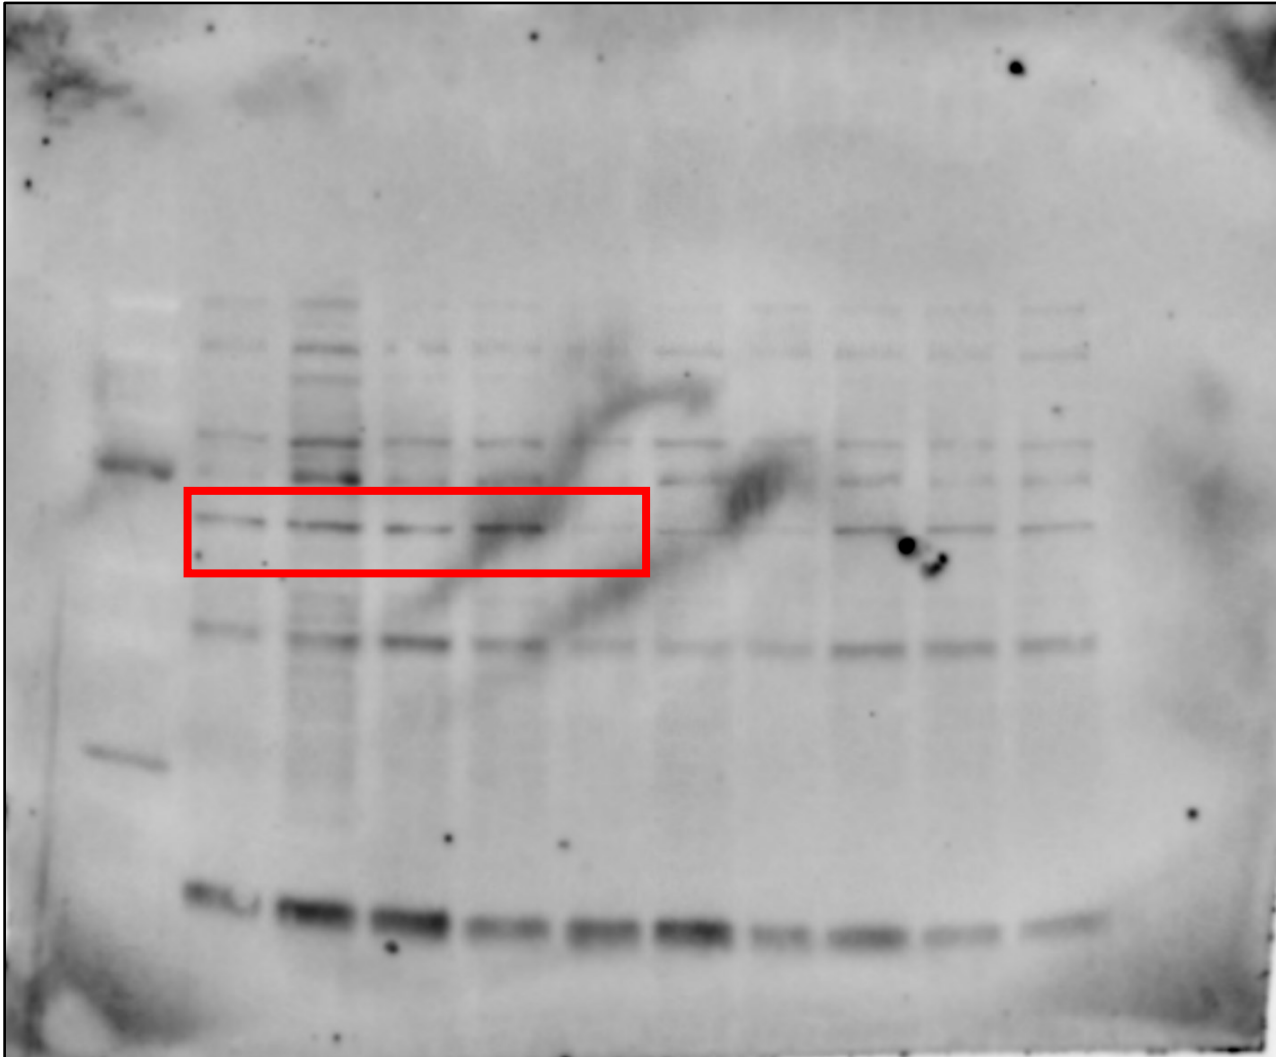

GAD65 (Fig. 3a)

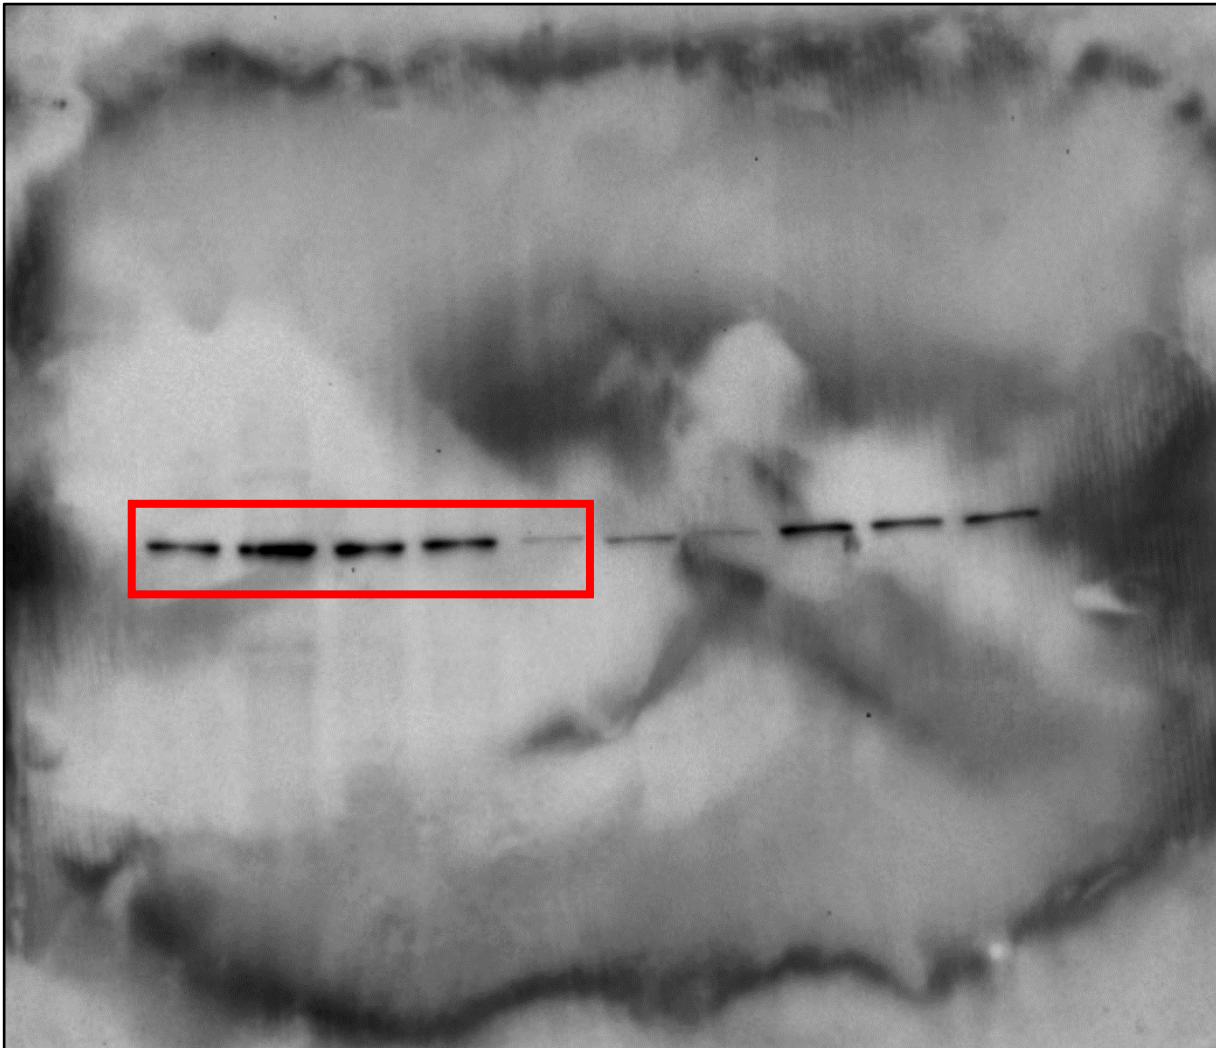

GAD67 (Fig. 3a)

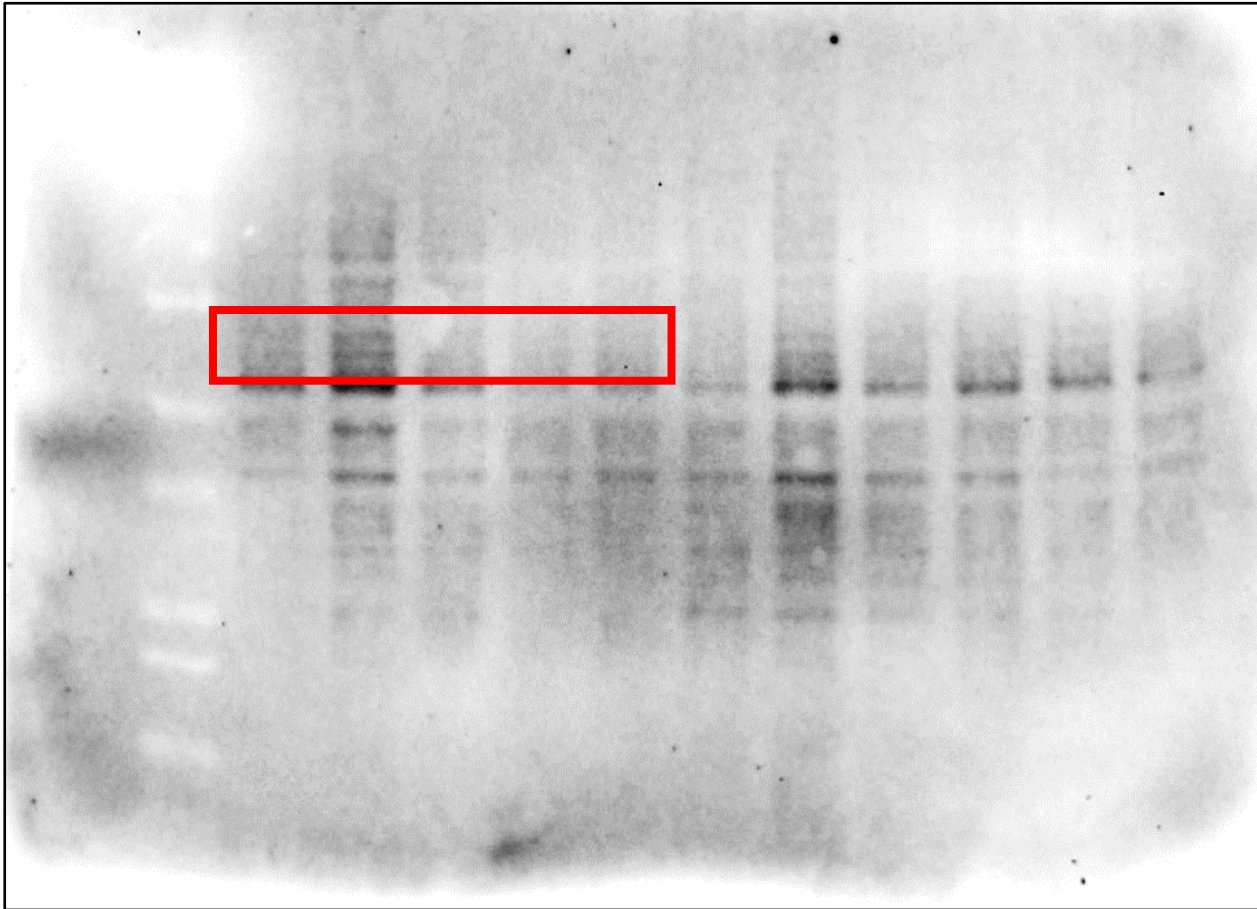

BNPI (Fig. 3a)

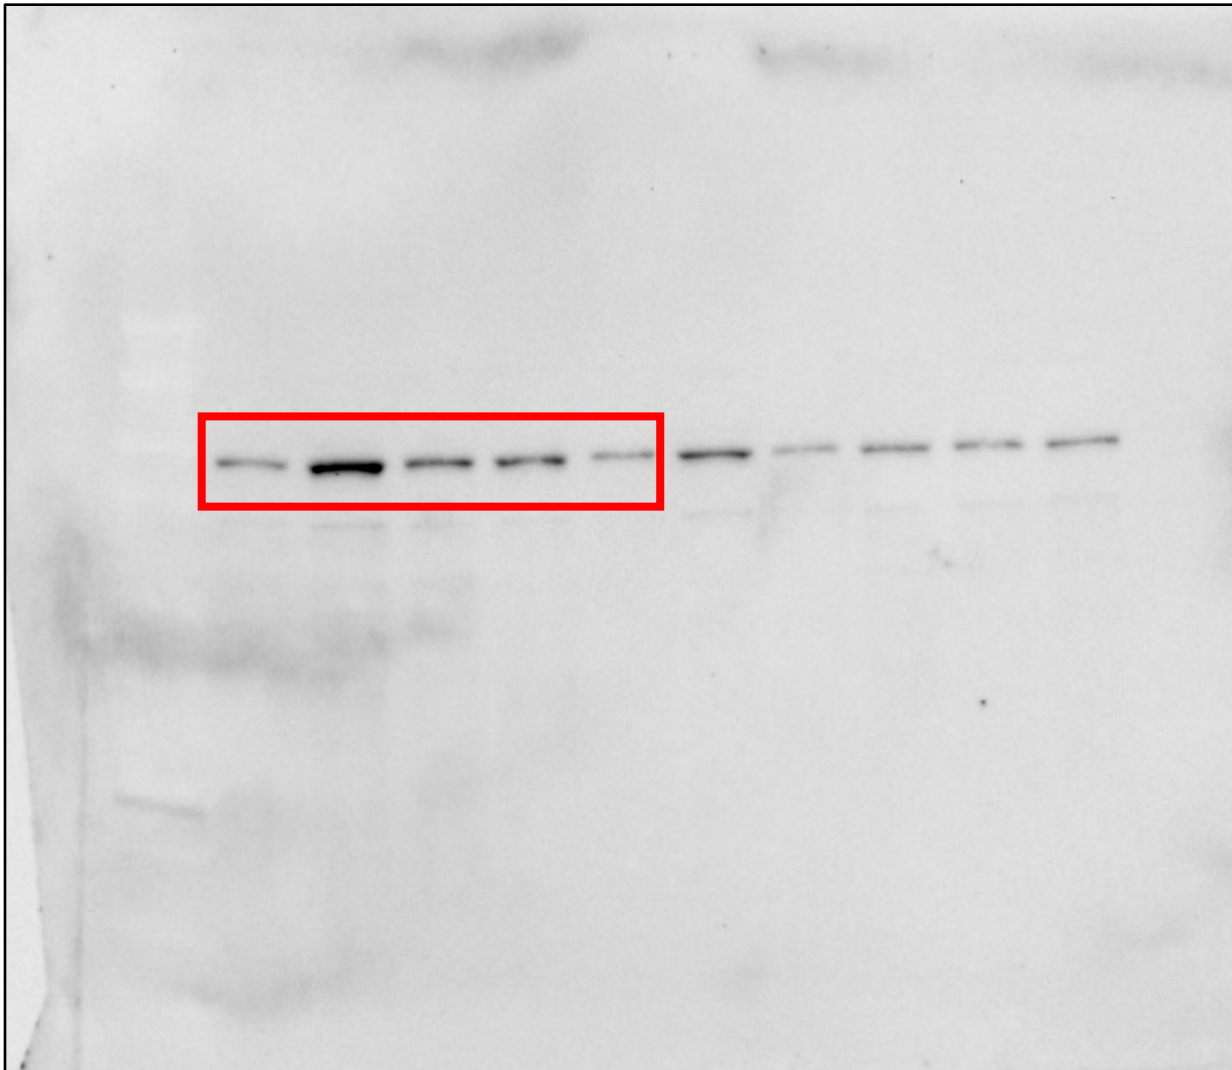



SOX2 (Fig. 3a)

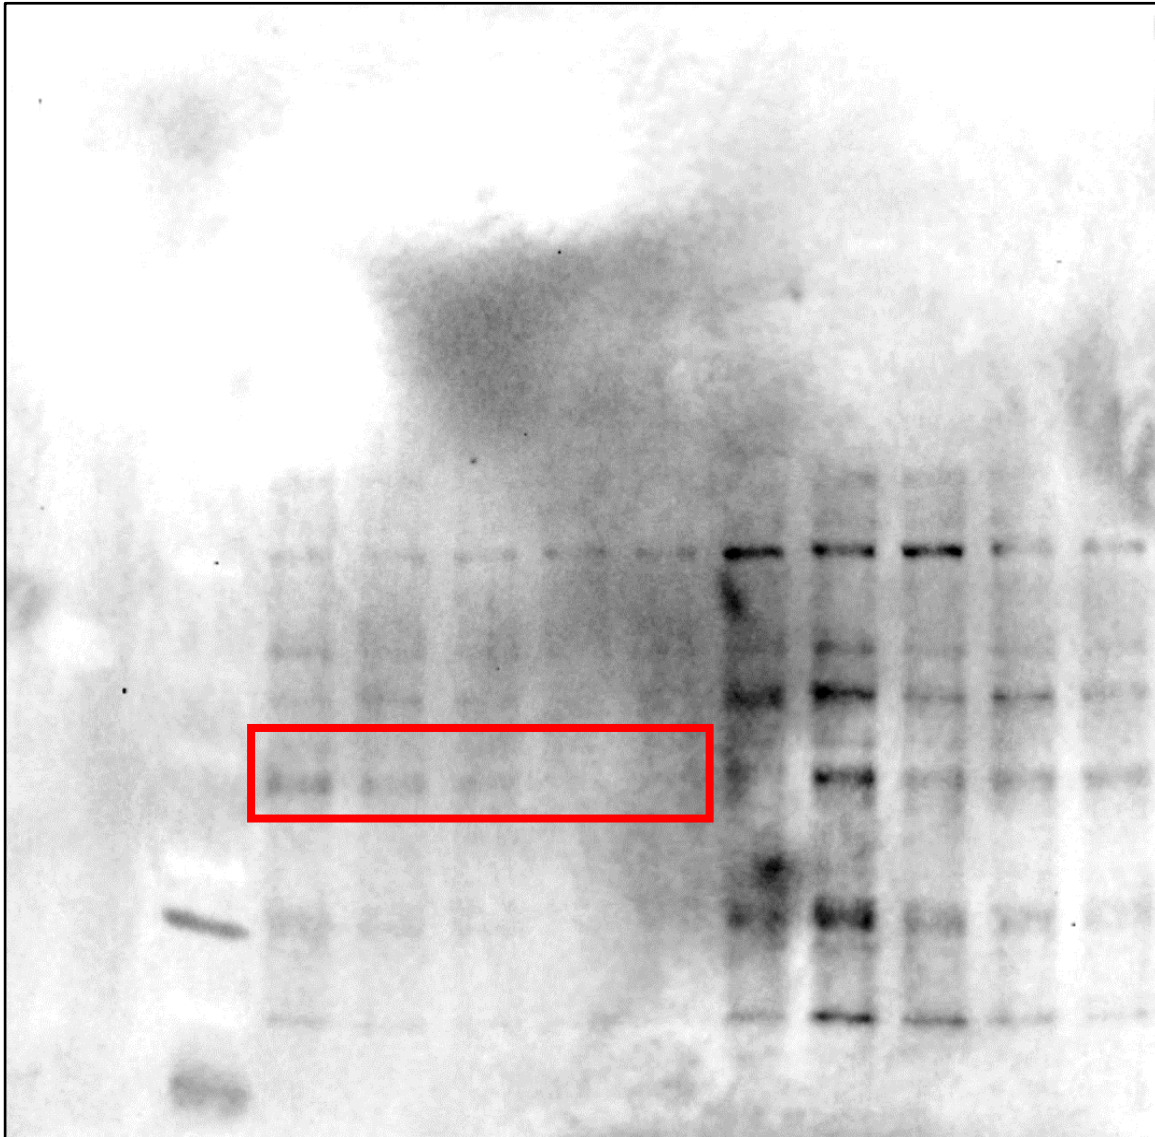

CD11b (Fig. 3a)

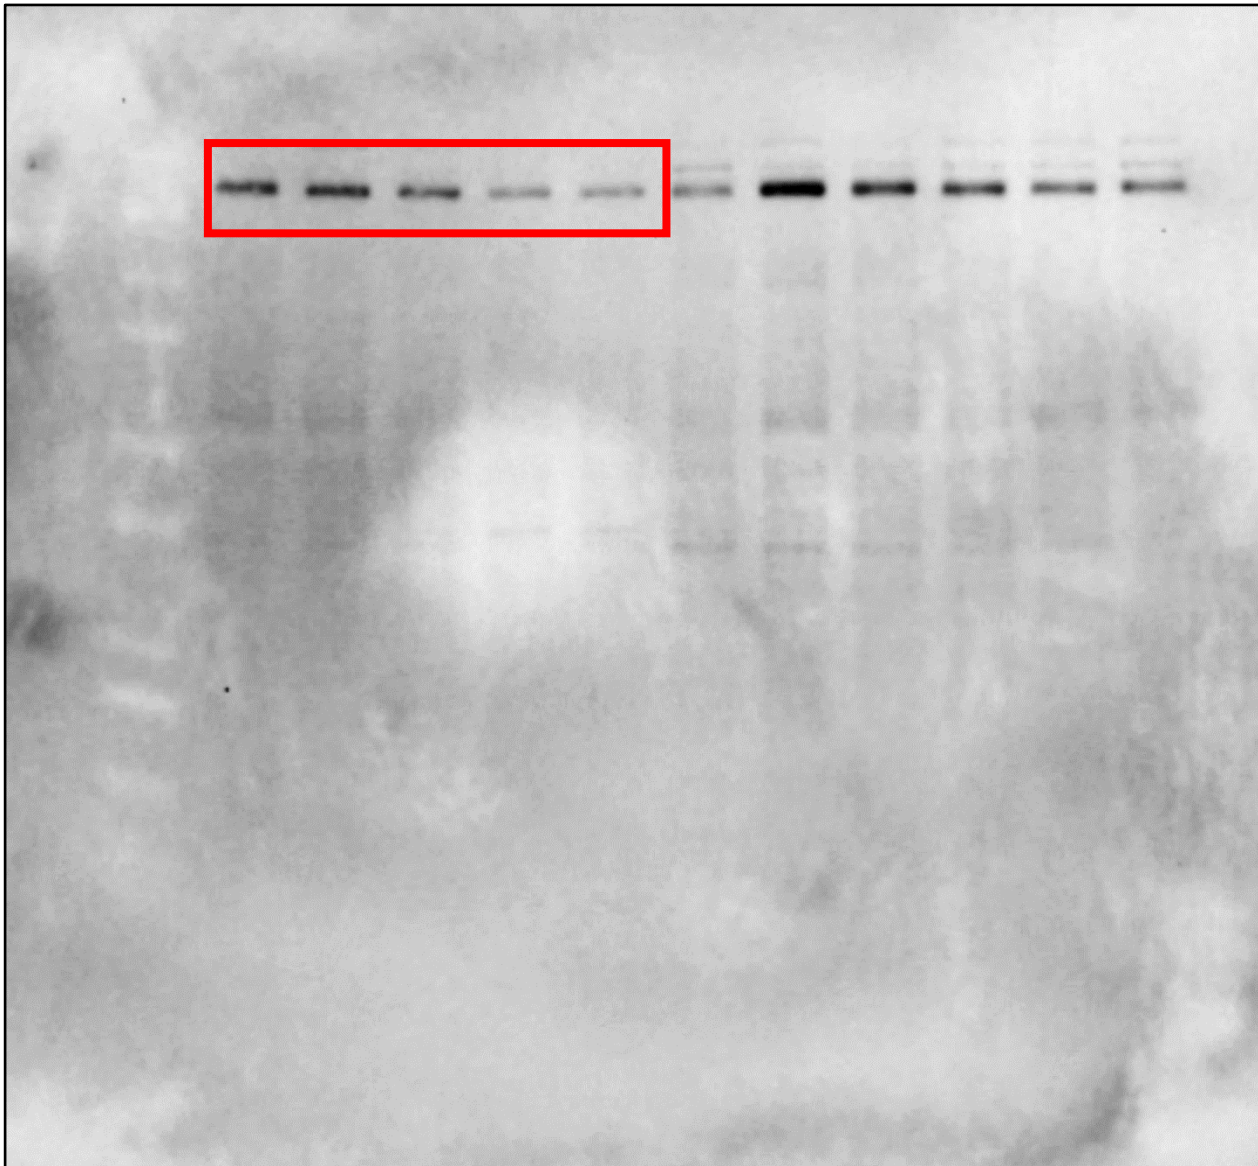

CD163 (Fig. 3a)

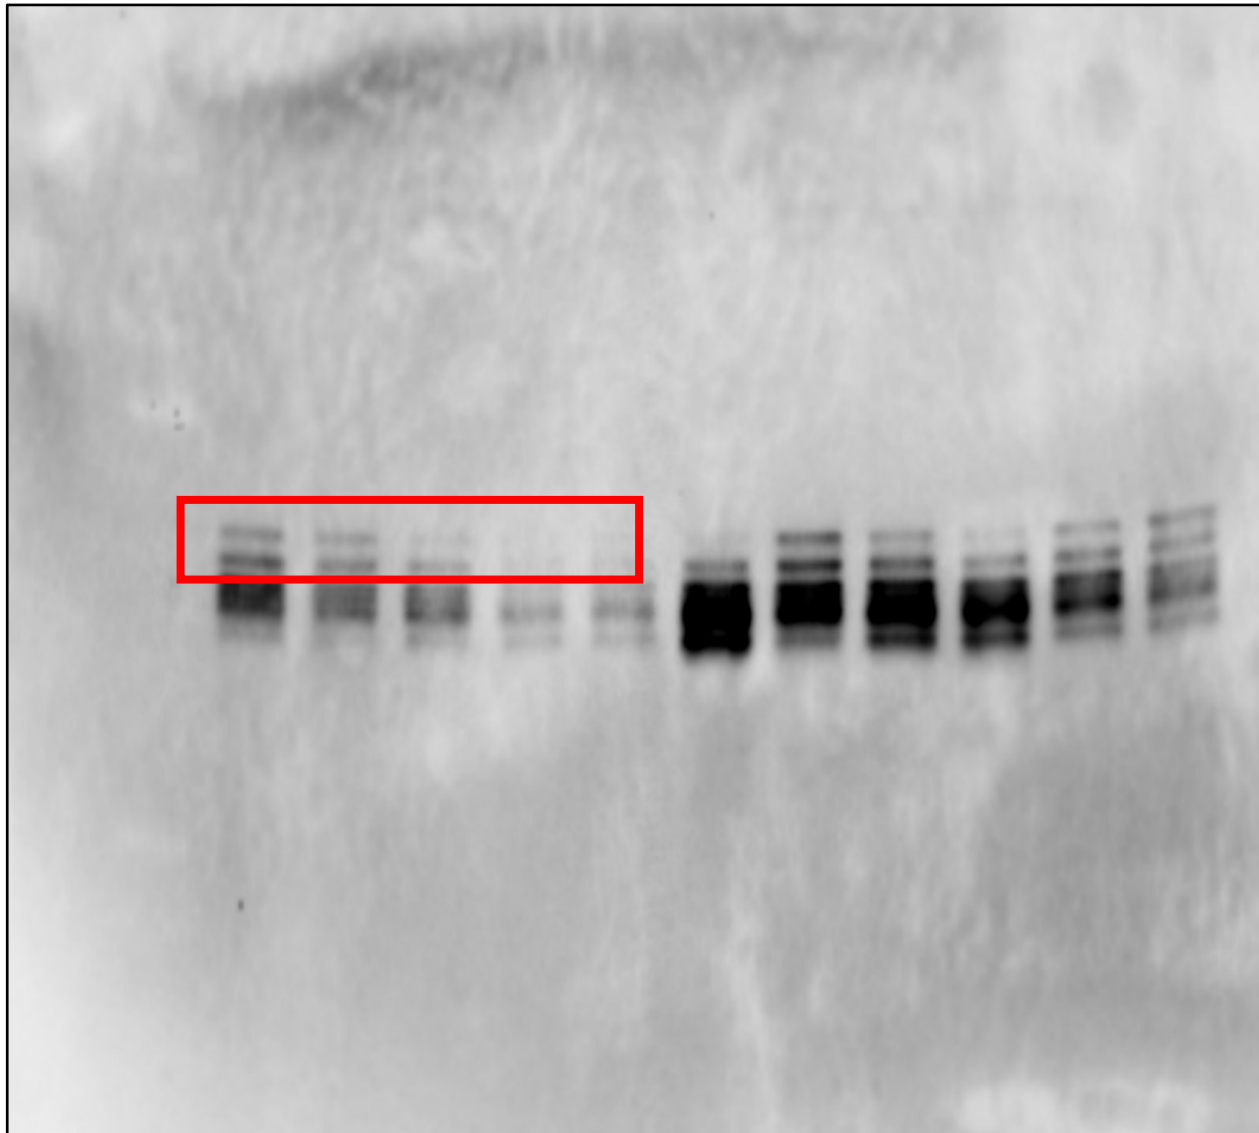

Actin (Fig. 3a)

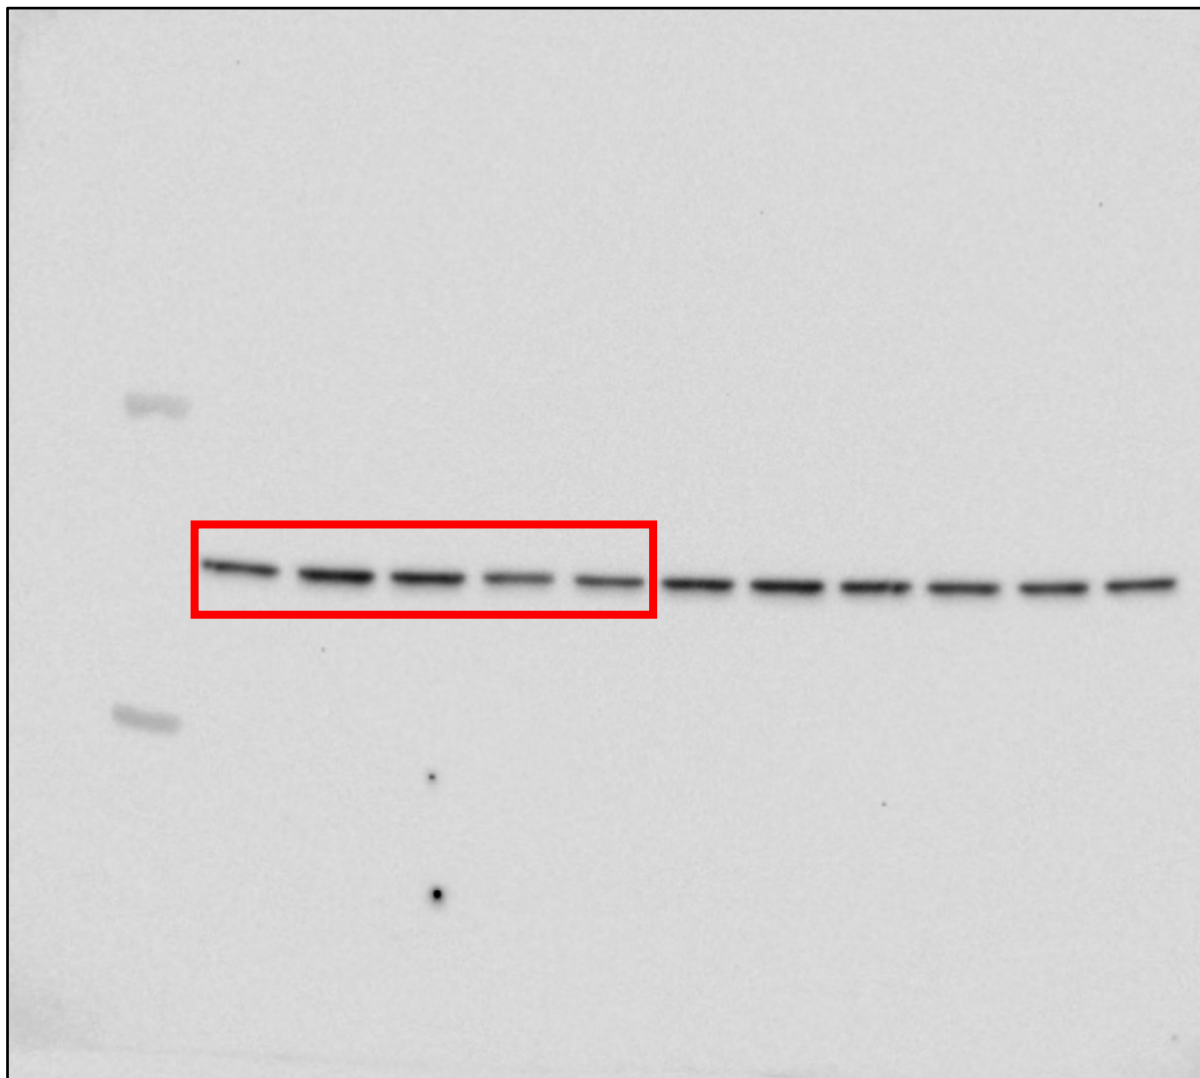

p19 (Fig. 3b)

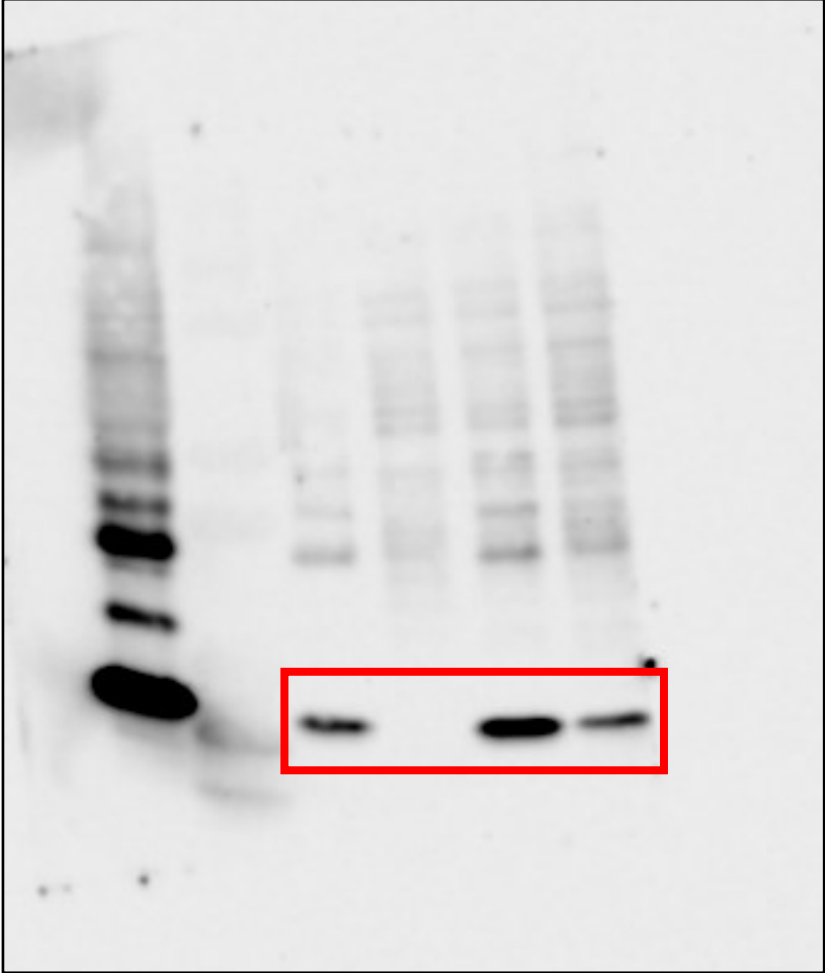

Tax (Fig. 3b)

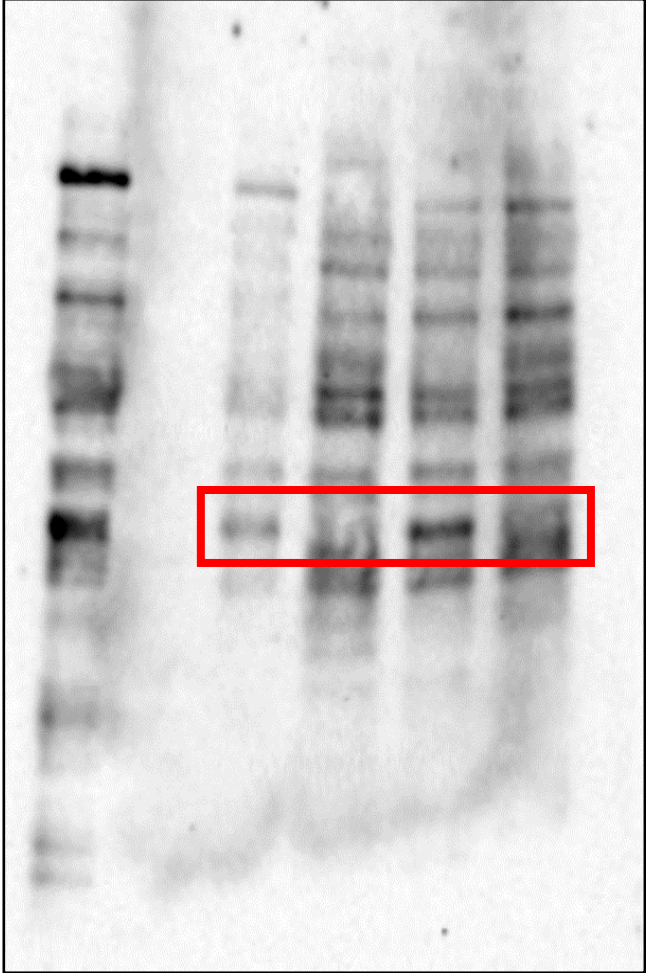

Actin (Fig. 3b)

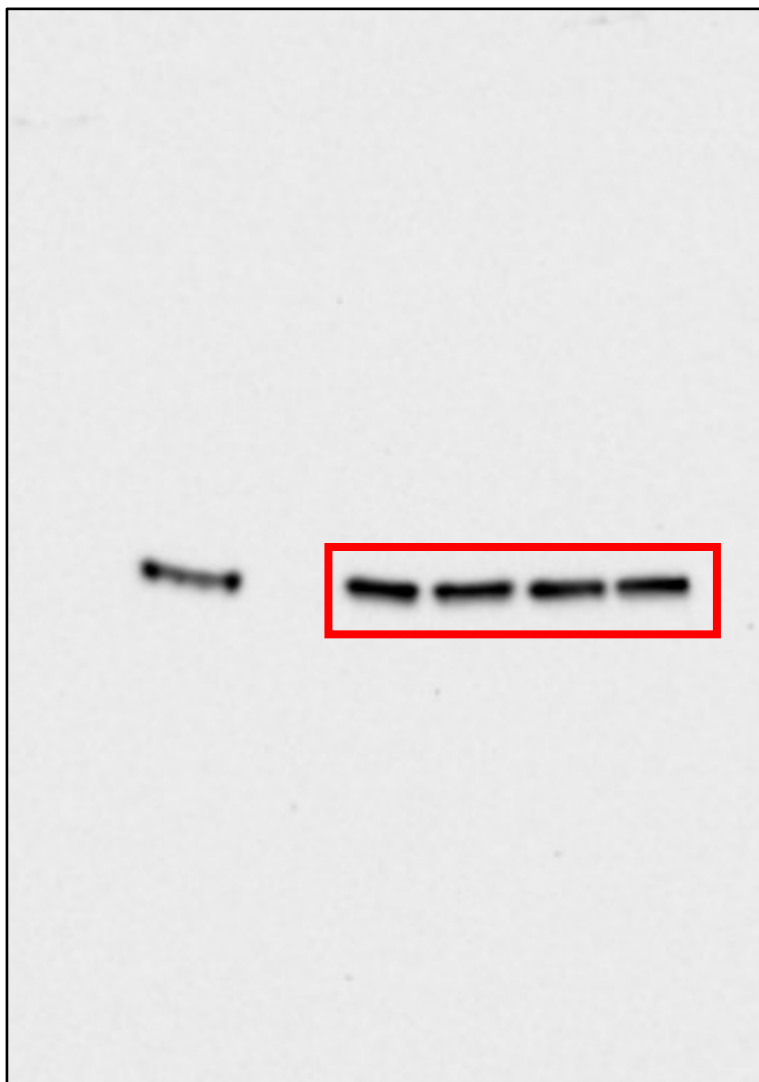

PARP-1 (Fig. 5a)

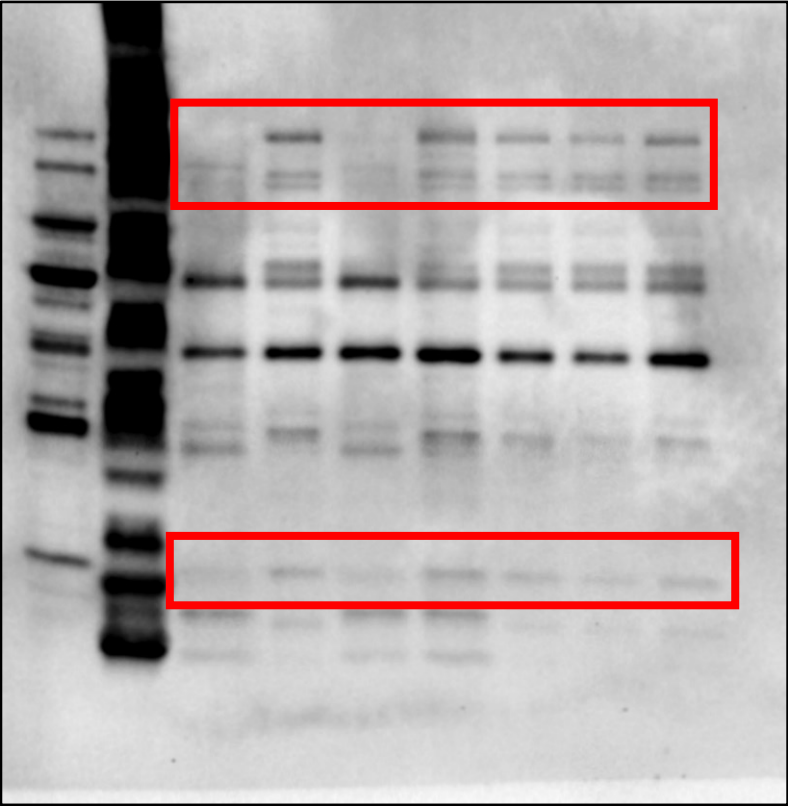

Caspase-3 (Fig. 5a)

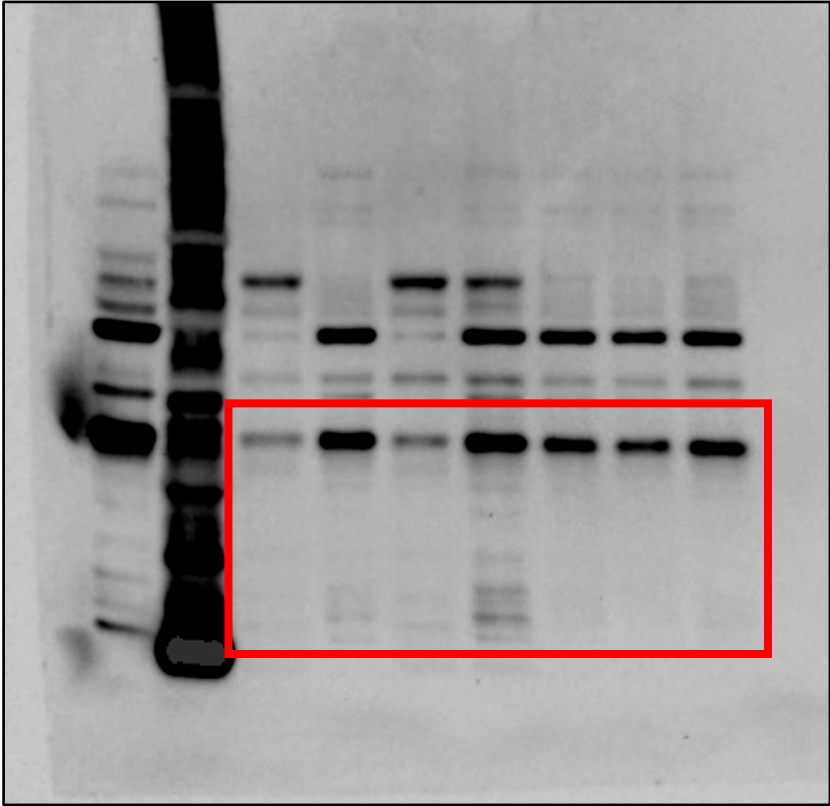

BAD (Fig. 5a)

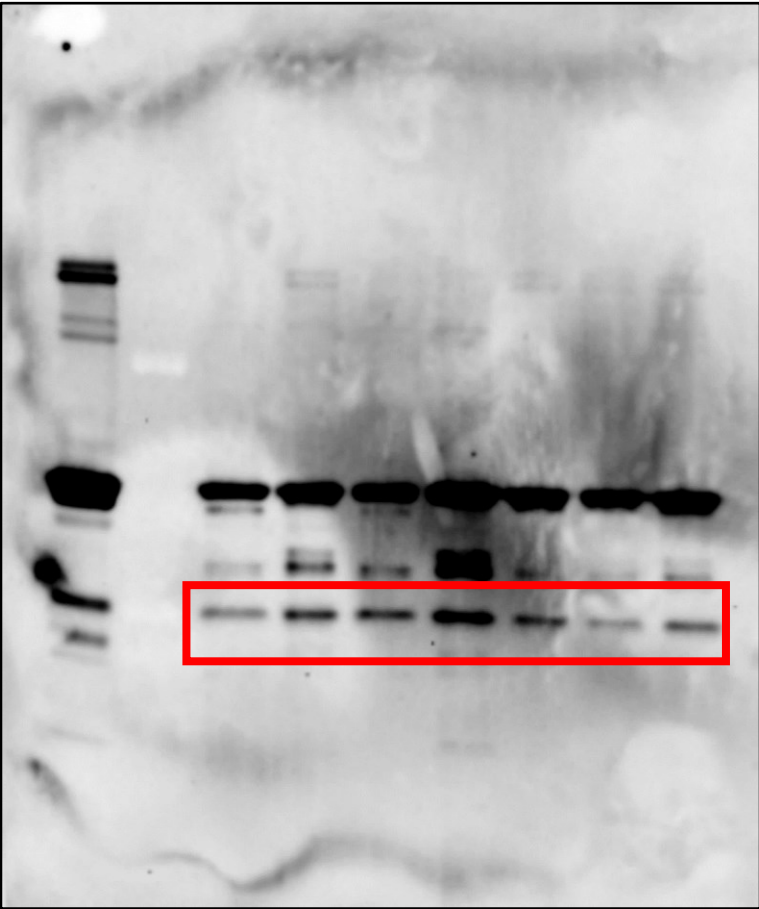

Actin (Fig. 5a)

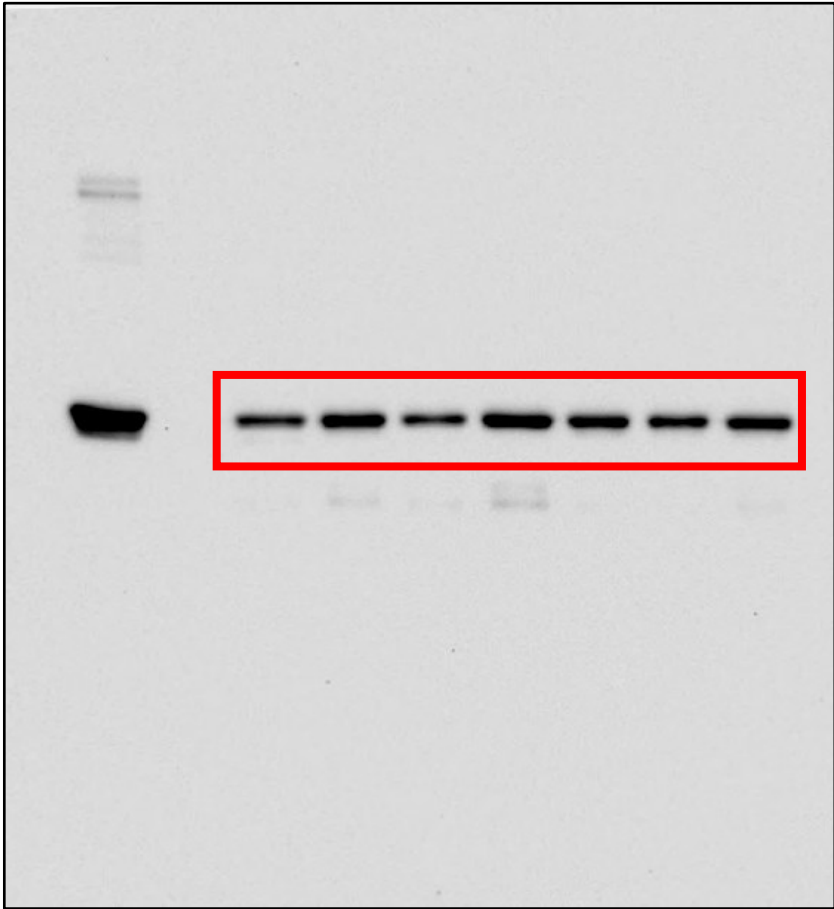



TNF $\alpha$  (Fig. 5b)

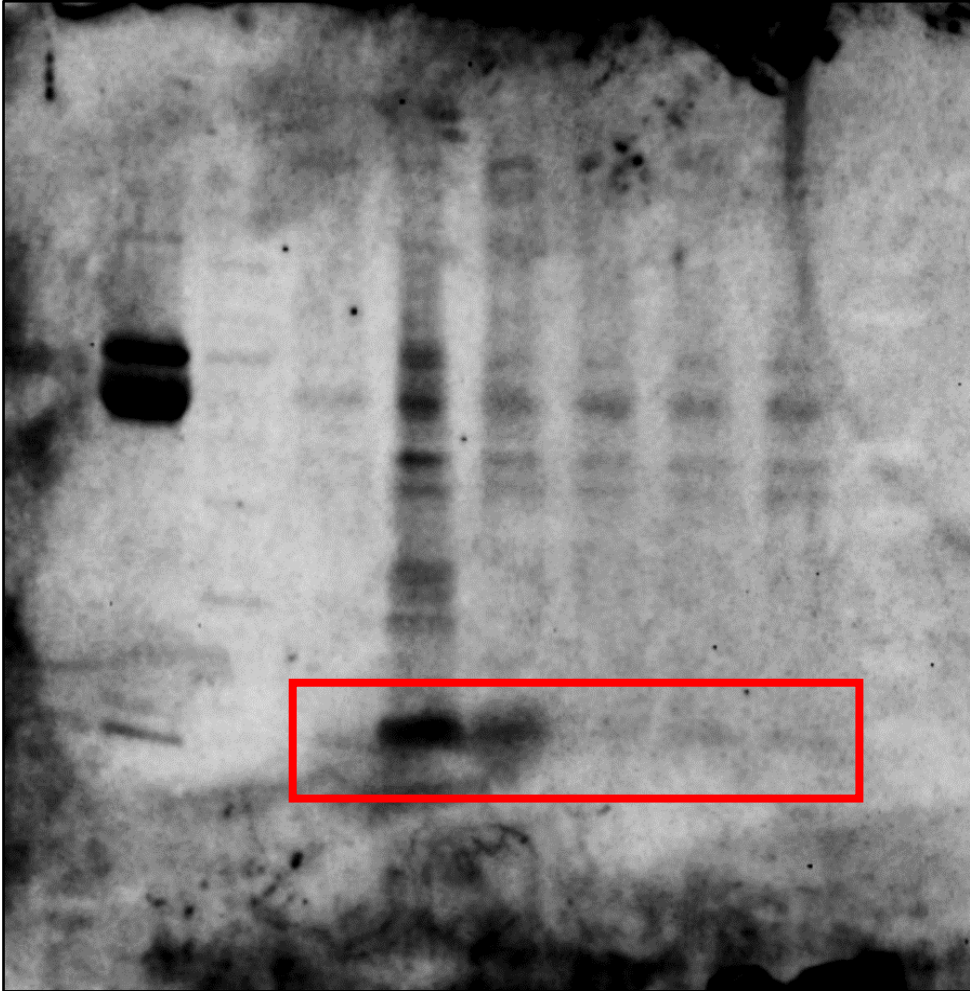

IL-8 (Fig. 5b)

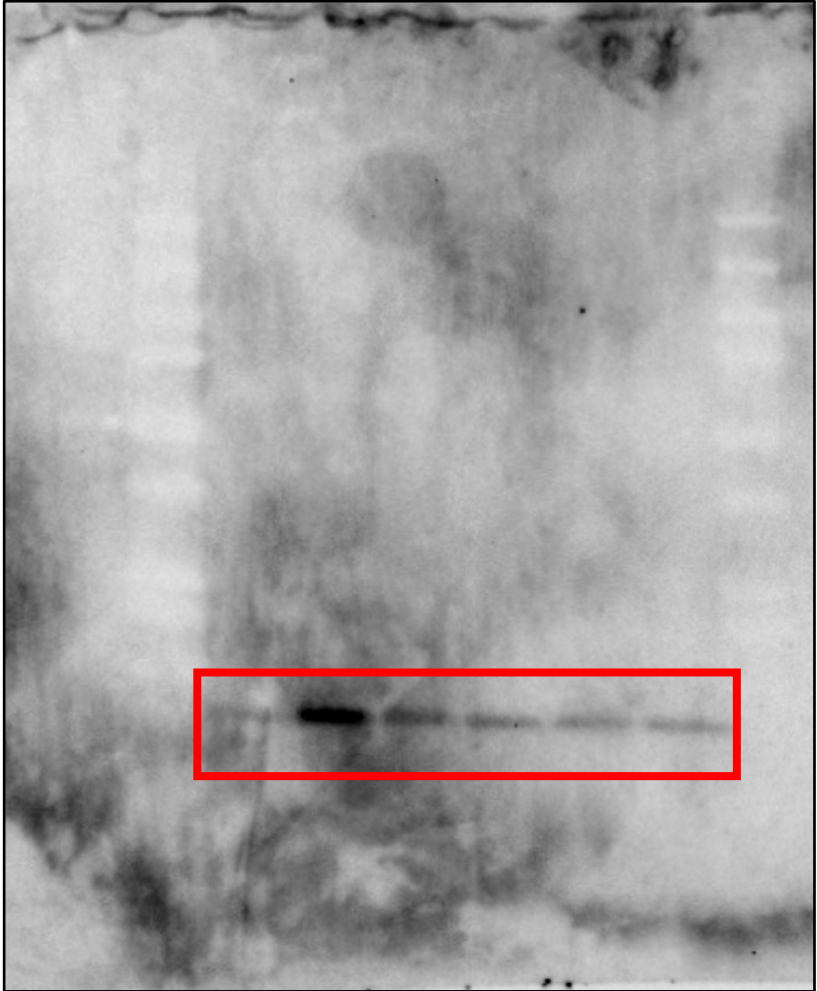

IL-1 $\beta$  (Fig. 5b)

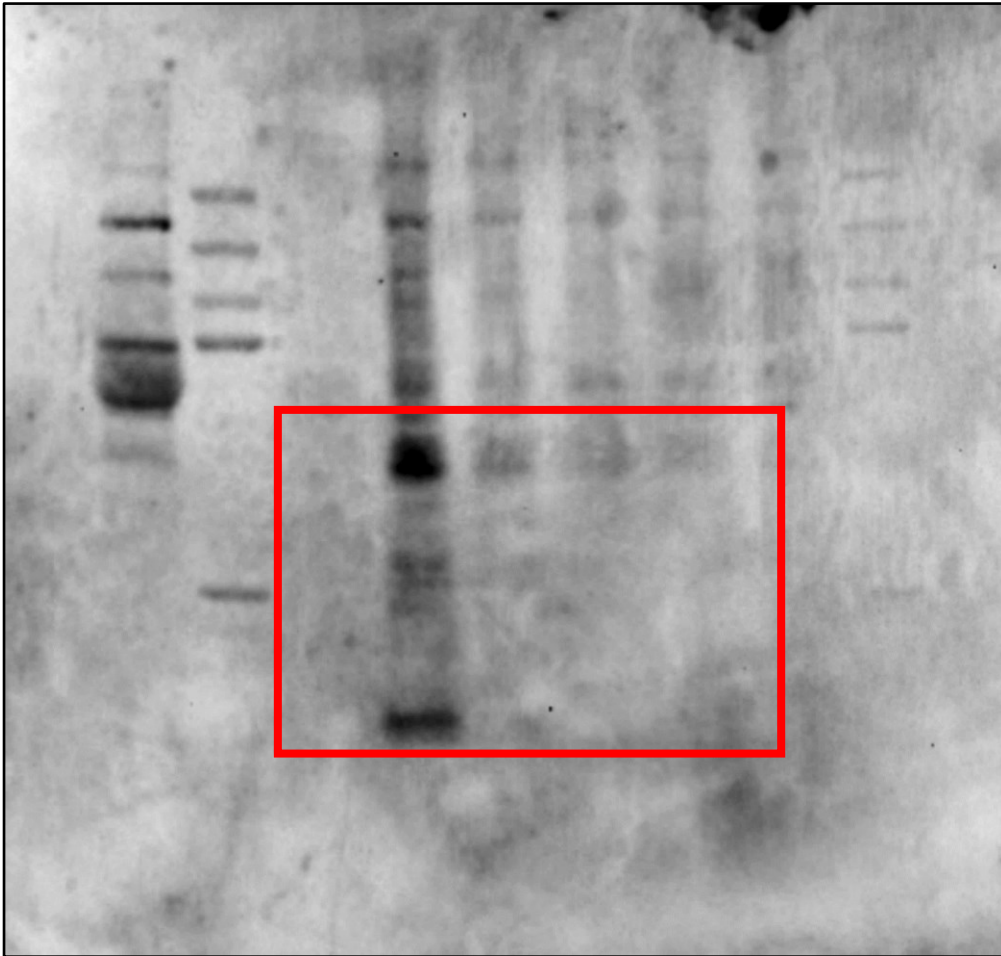

PKR (Fig. 7c)

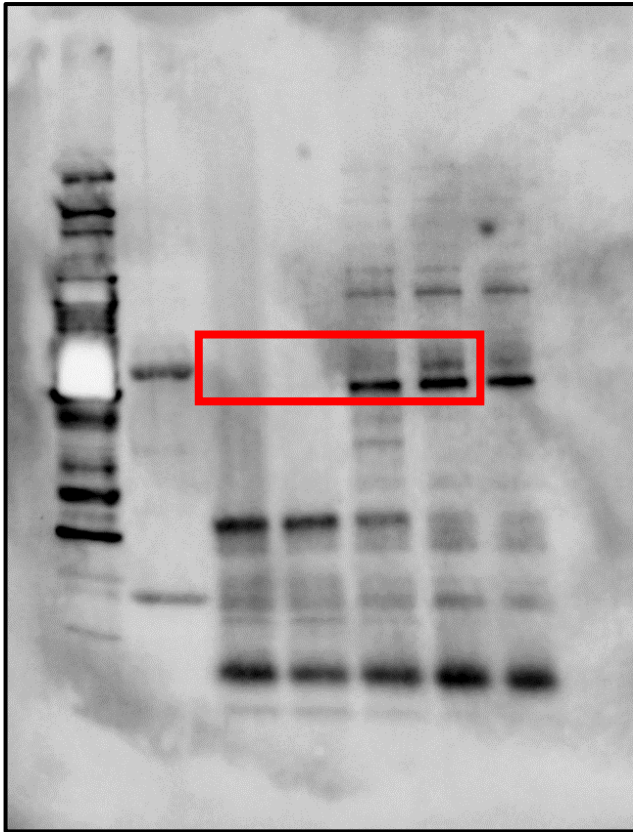

DICER (Fig. 7c)

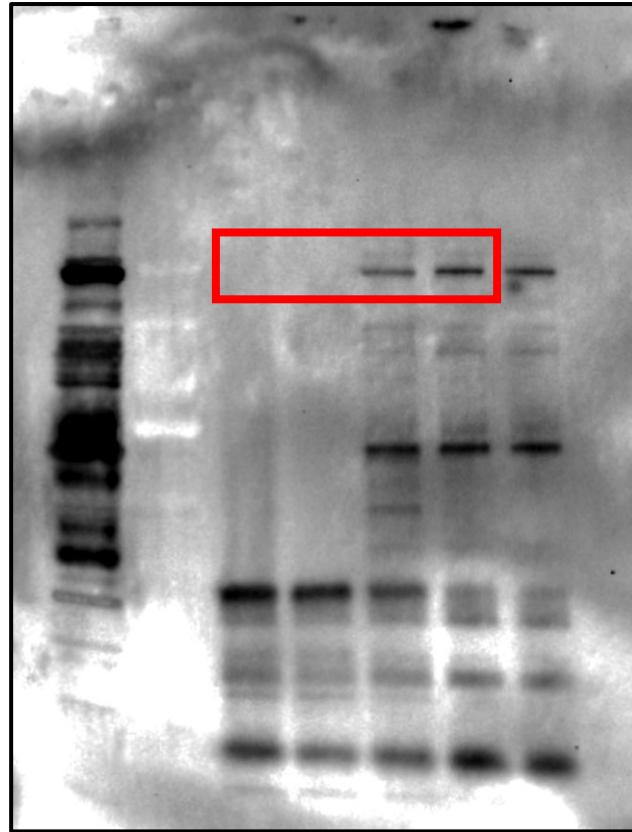

ADAR1 (Fig. 7c)

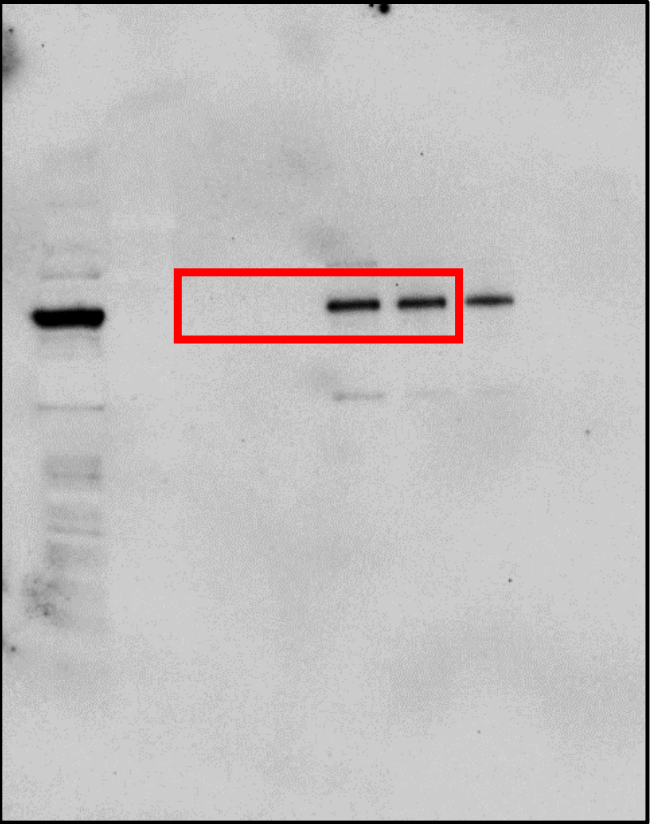

MMP9 (Supplementary Fig. 2d)

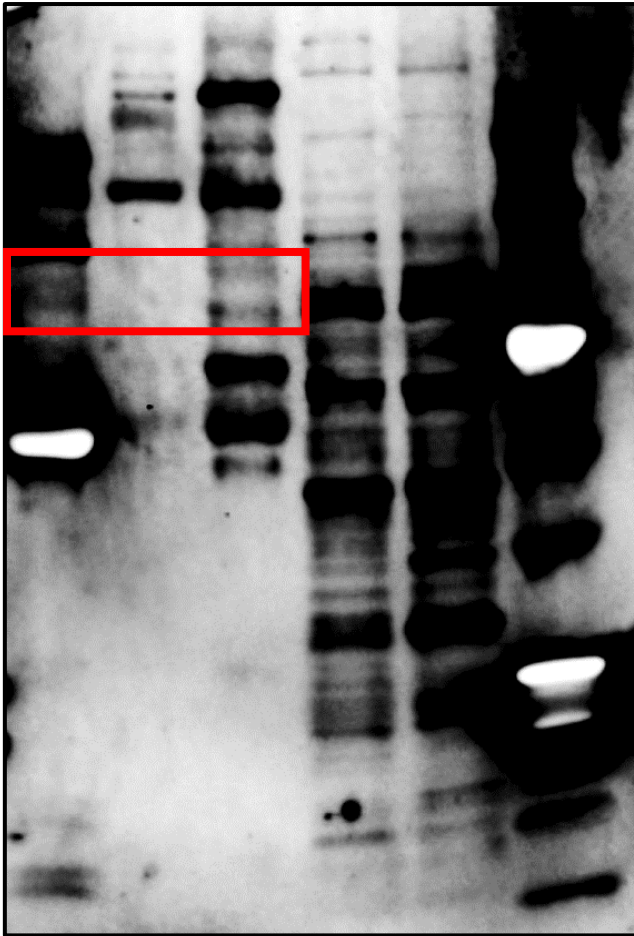

Actin (Supplementary Fig. 2d)

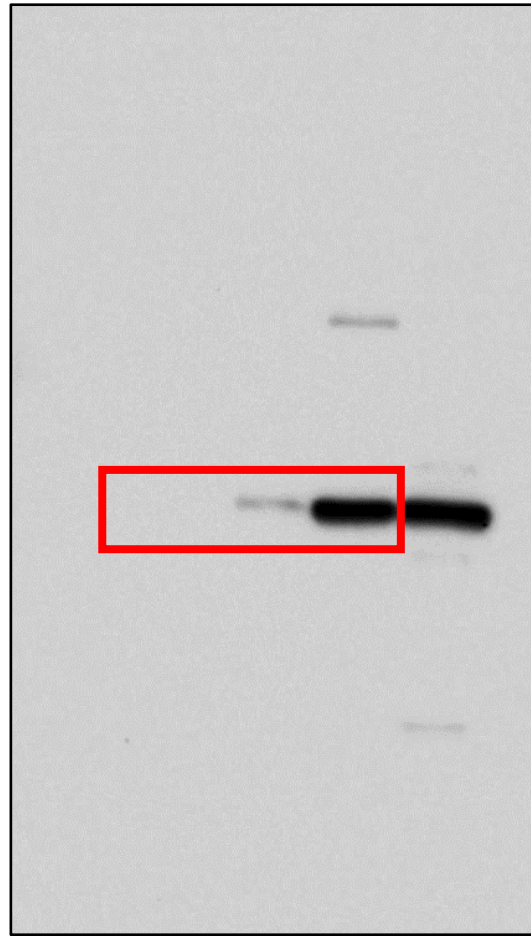

Supplementary Fig. 2e

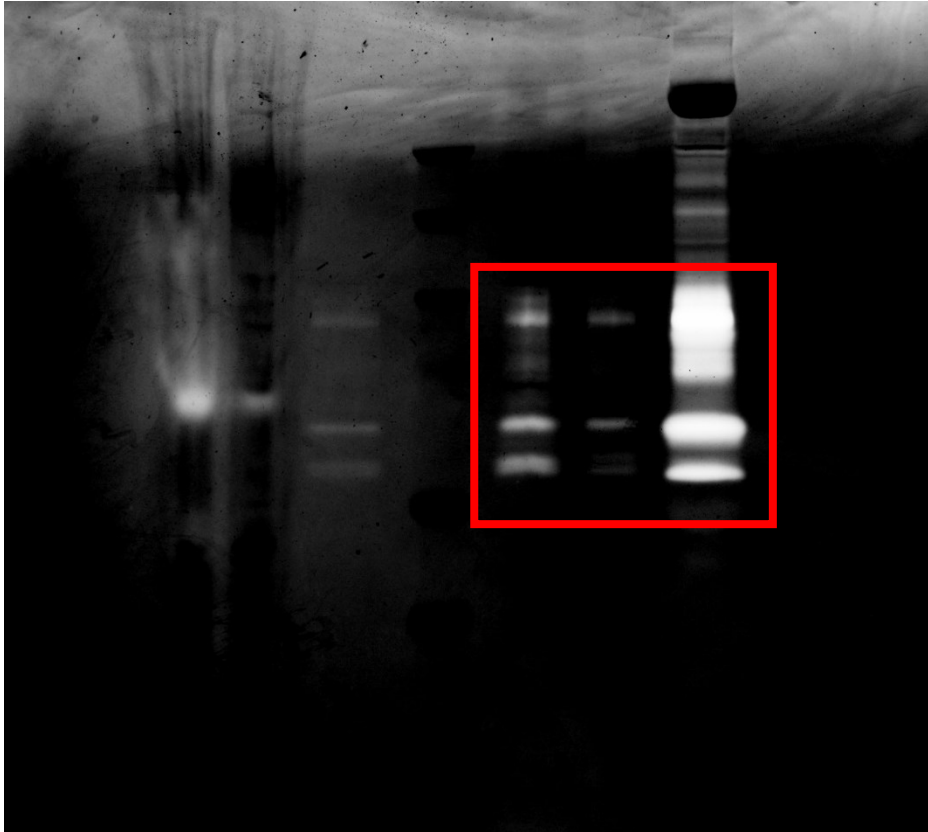

TNF $\alpha$  (Supplementary Fig. 3)

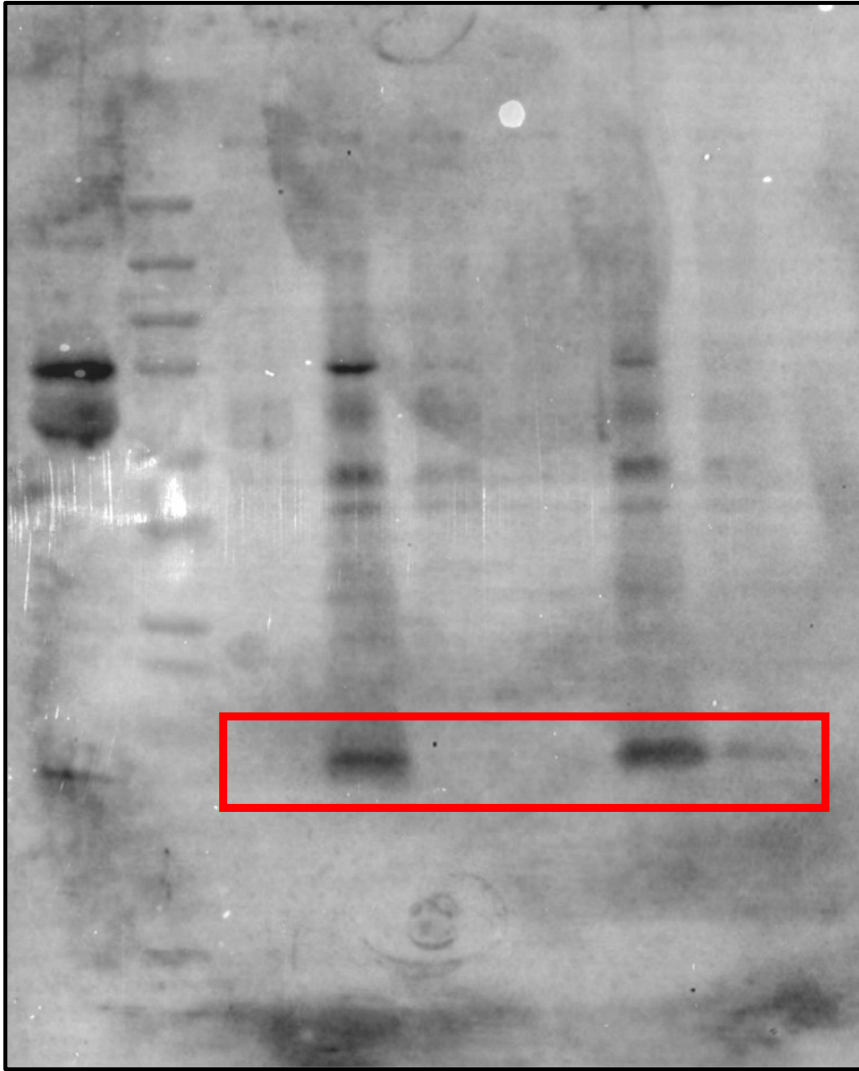

IL-8 (Supplementary Fig. 3)

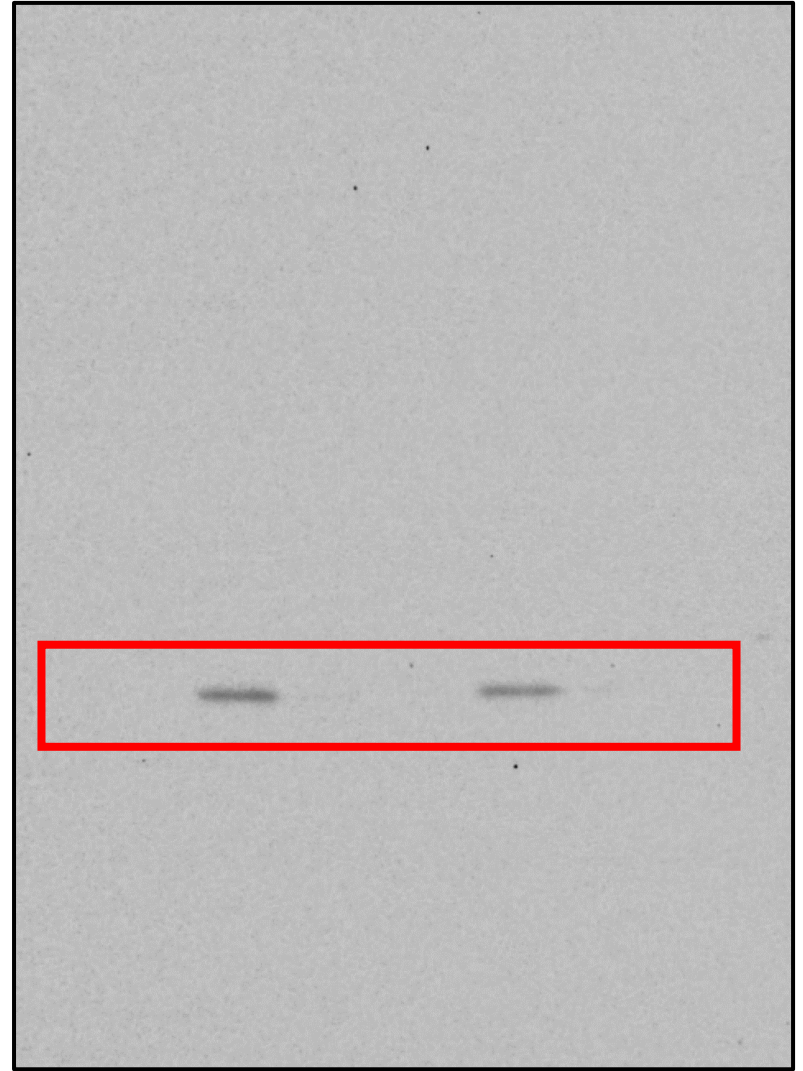

IL-1 $\beta$  (Supplementary Fig. 3)

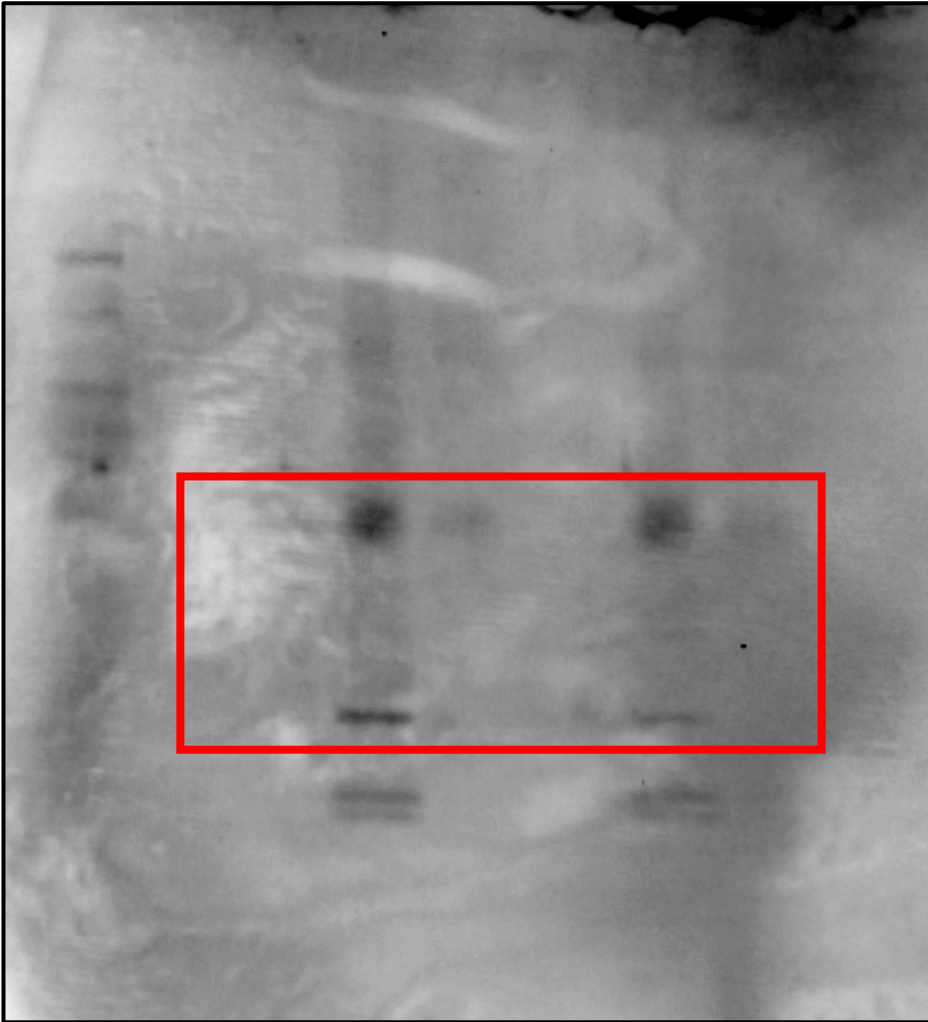



PKR (Supplementary Fig. 4)

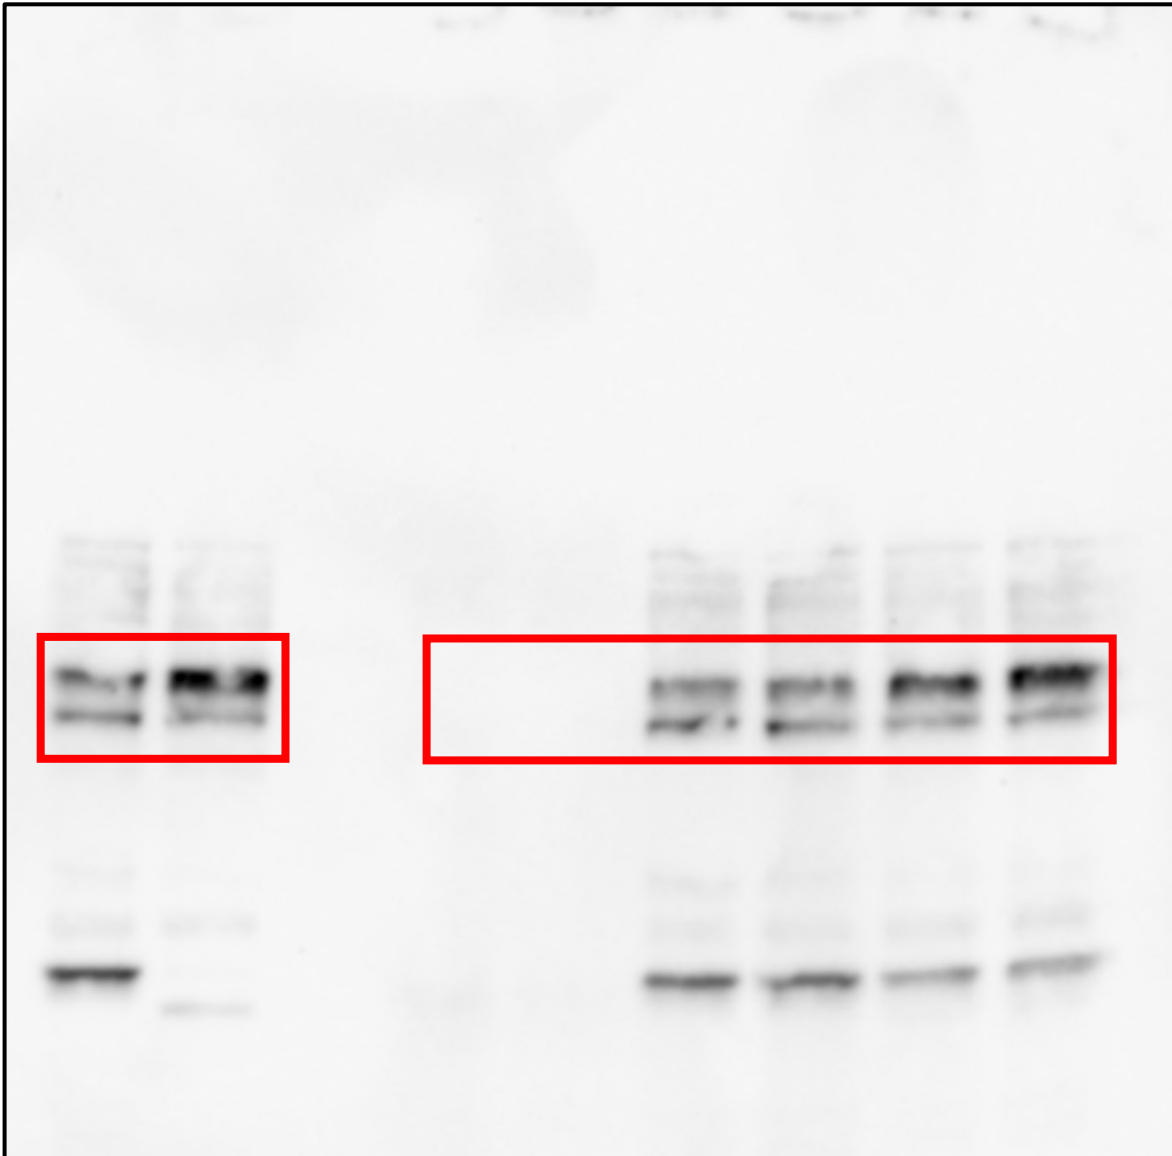

Branscome et al. Supplementary Figure 8

DICER (Supplementary Fig. 4)

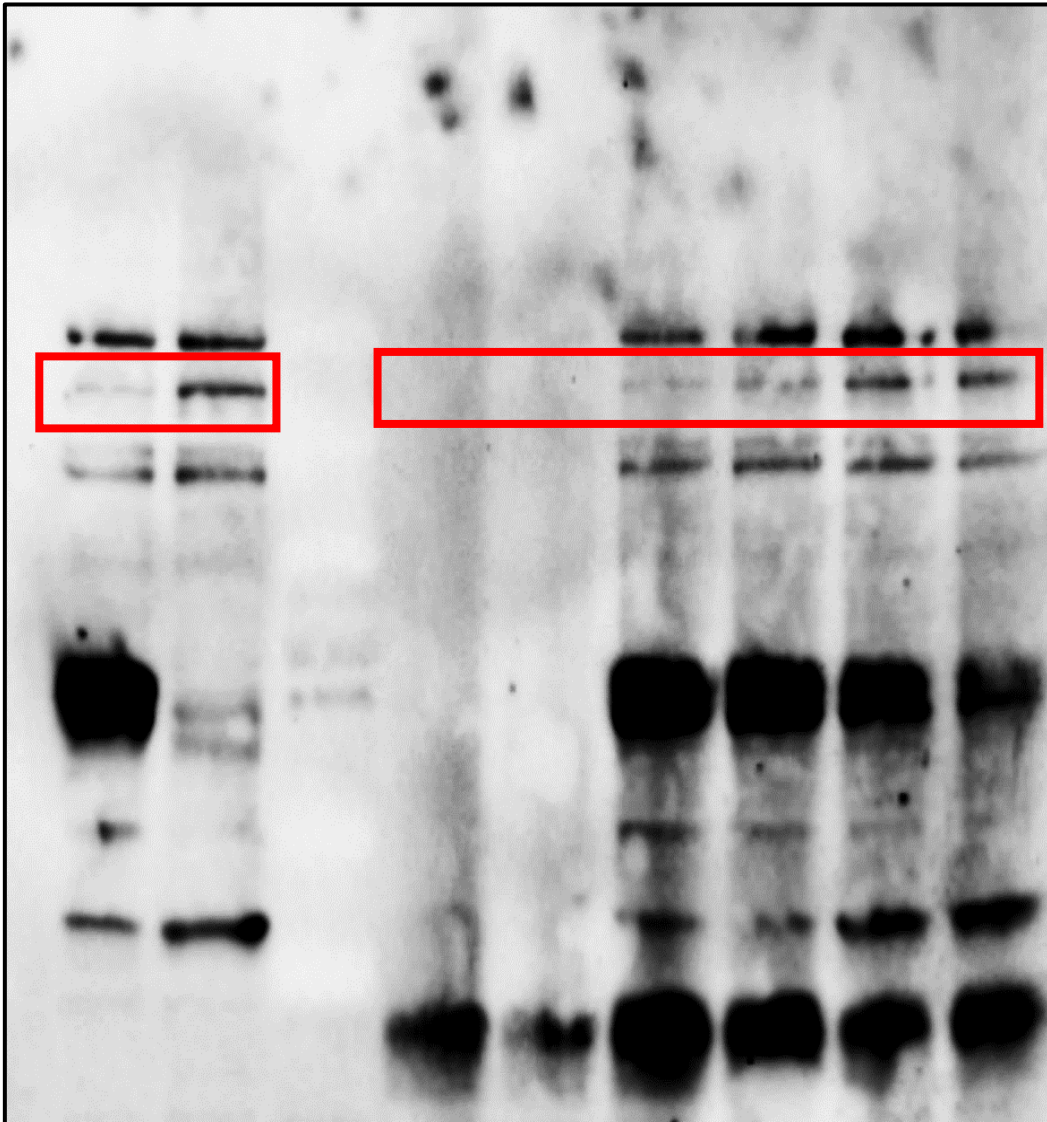

Branscome et al. Supplementary Figure 8

RIG-I (Supplementary Fig. 4)

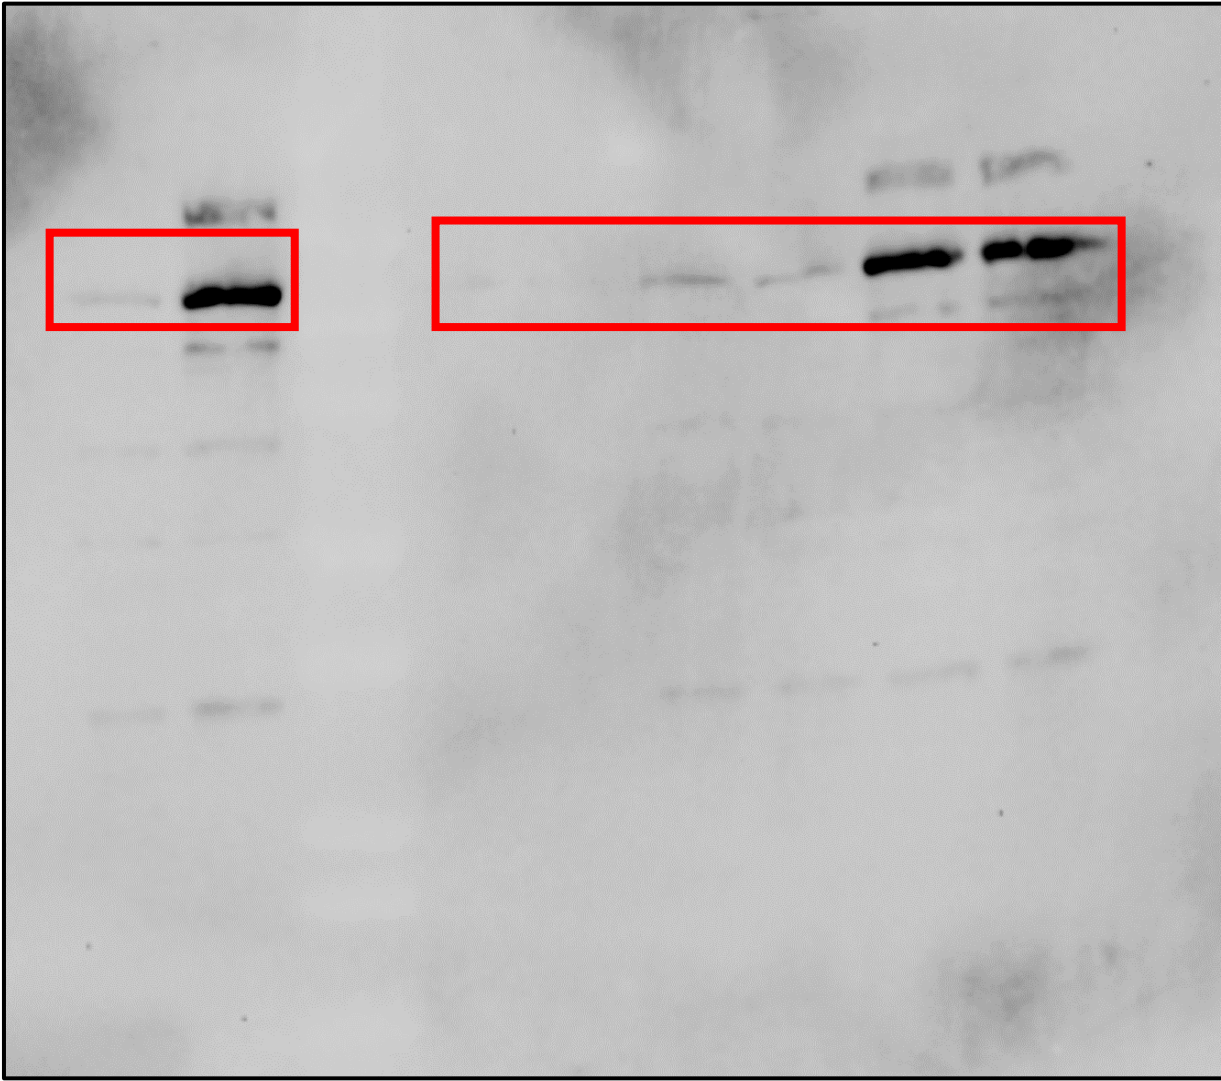

CD4 (Supplementary Fig. 6)

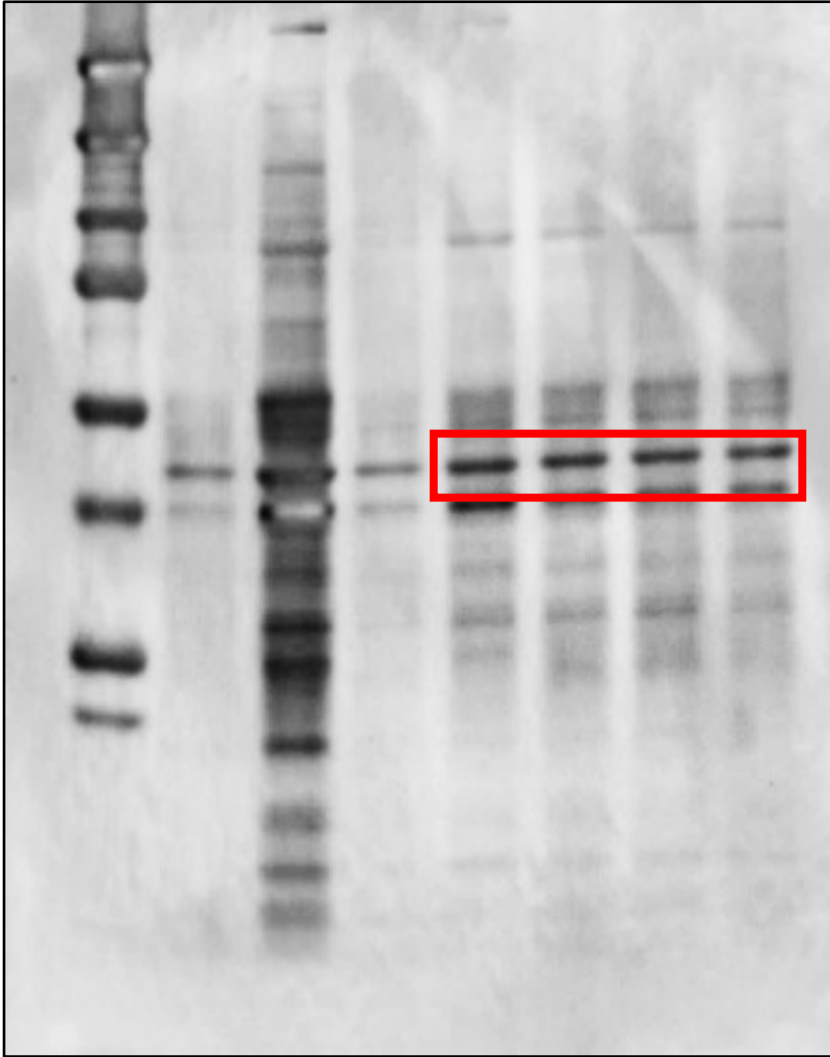

CCR5 (Supplementary Fig. 6)

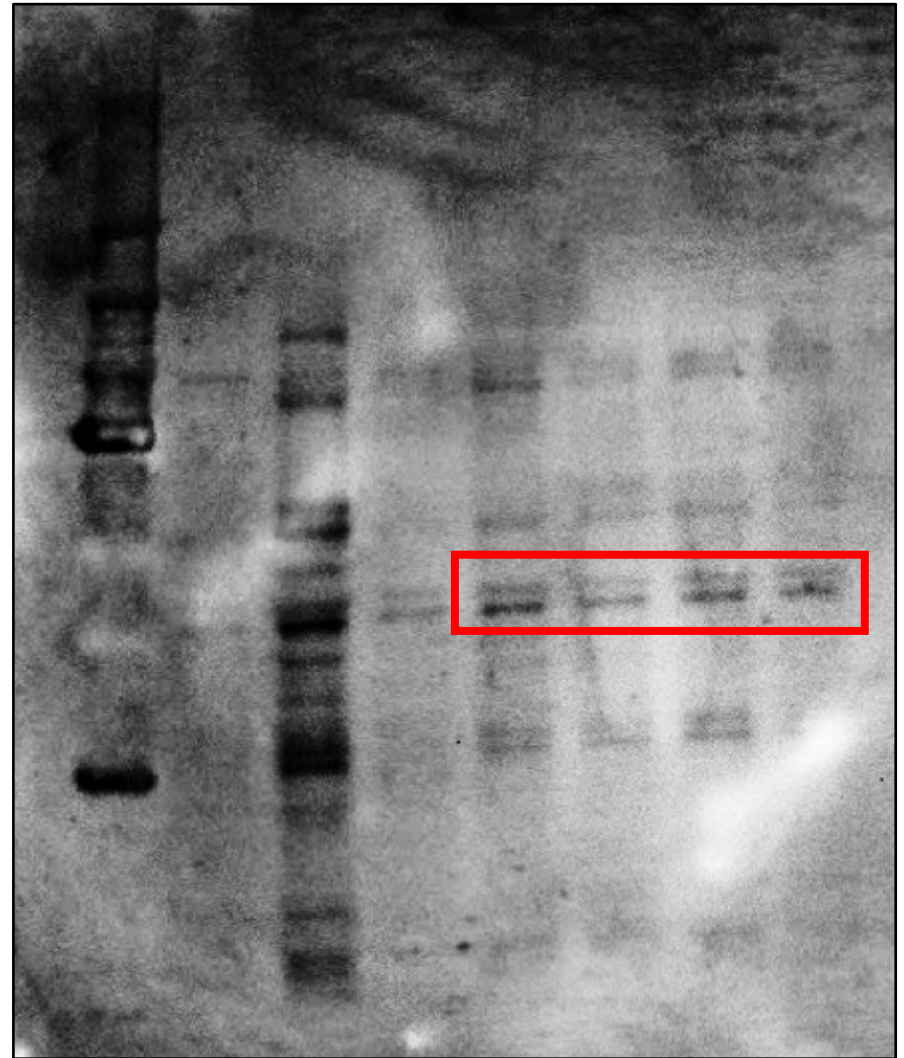

Actin (Supplementary Fig. 6)

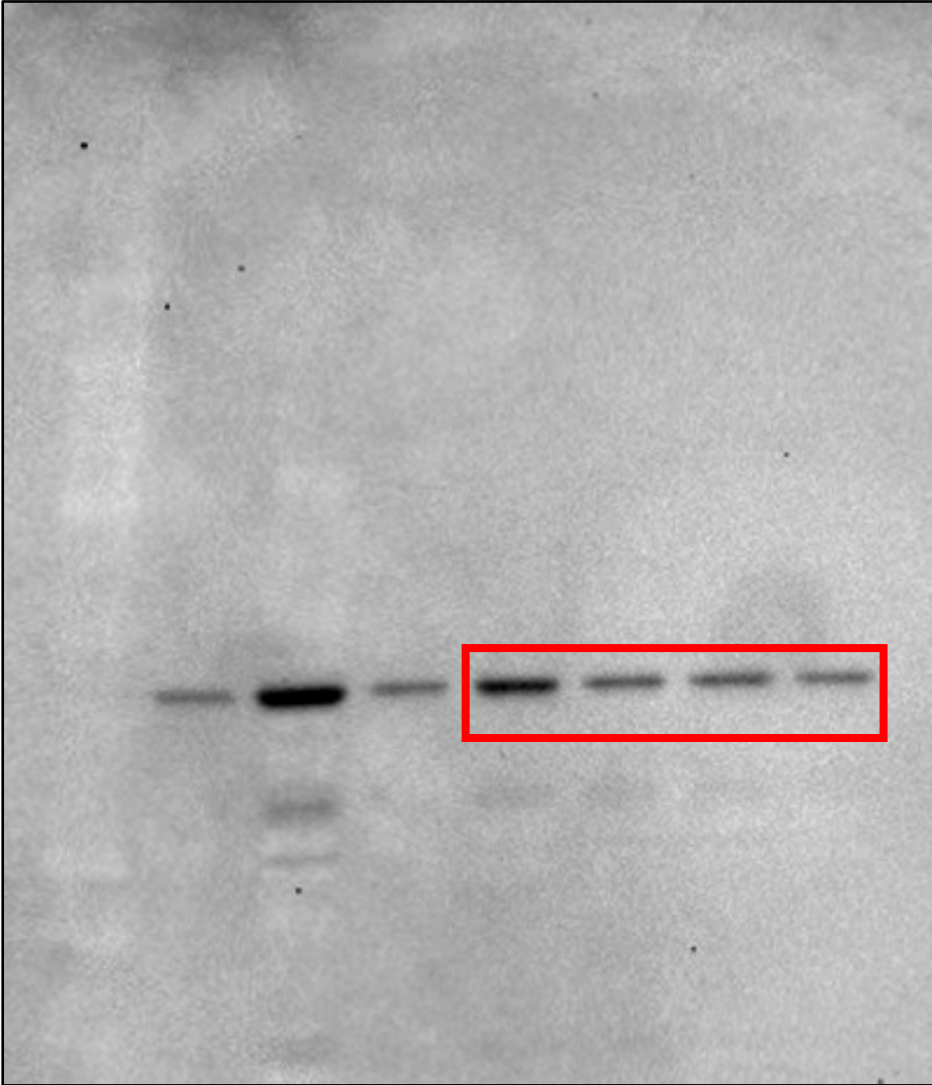

Supplementary Figure 11. Full-length blots corresponding to each western blot assay.
